# Supplementary material
Source: PubMed Central journal article supplement (PMC7450586)
Supplement: NIHMS906054-supplement-supporting_materials.pdf [file NIHMS906054-supplement-supporting_materials.pdf]

**Supplementary Material**

**Disulfide-mediated beta strand dimers: hyperstable beta sheets lacking tertiary interactions and turns**

**Brandon L. Kier\*, Jordan M. Anderson and Niels H. Andersen\***

**Author Affiliation: University of Washington Chemistry Department, Seattle, WA, USA**

**Figure S1:** Normalized CD melts for peptides of the form **KWRWRTR** (linker) **RKIKRWY**. (Melting of the exciton couplet maxima, at 228nm, is followed.)

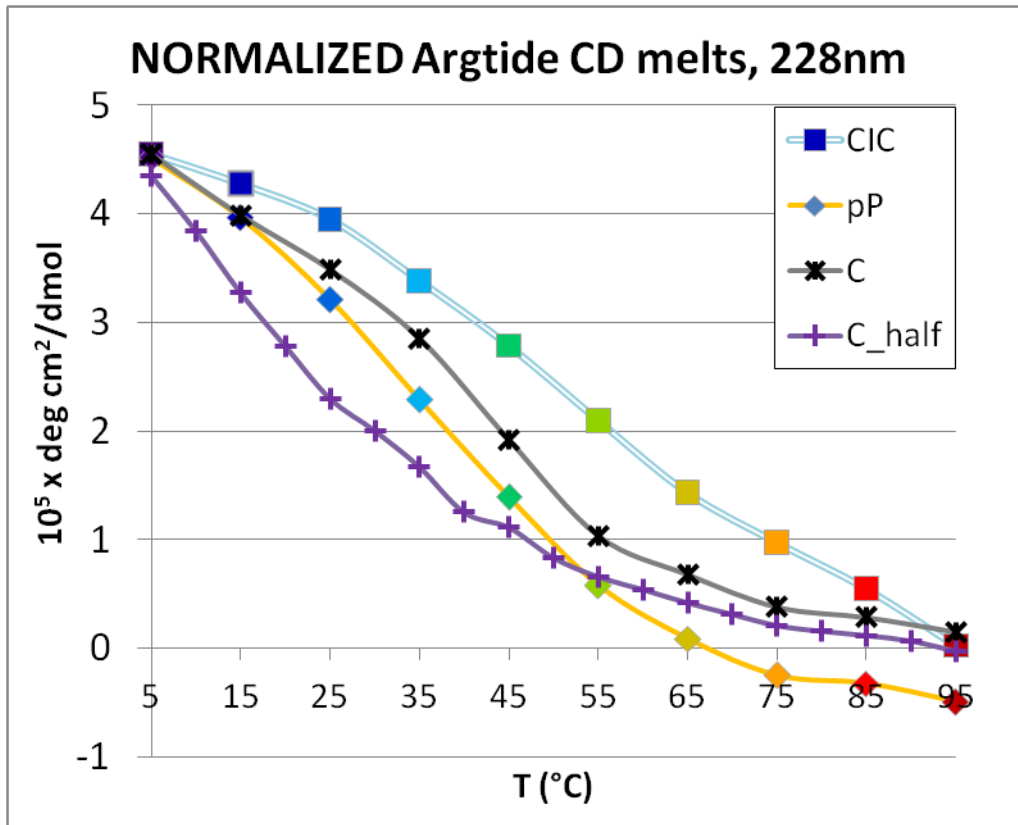

**Figure S2:** NOE-validated models of disulfide-bearing beta sheet dimers:

**S2a (below):** The all-cysteine (bis-disulfide) homodimer. Sequence **RWITK**C**ICIRKWE**.

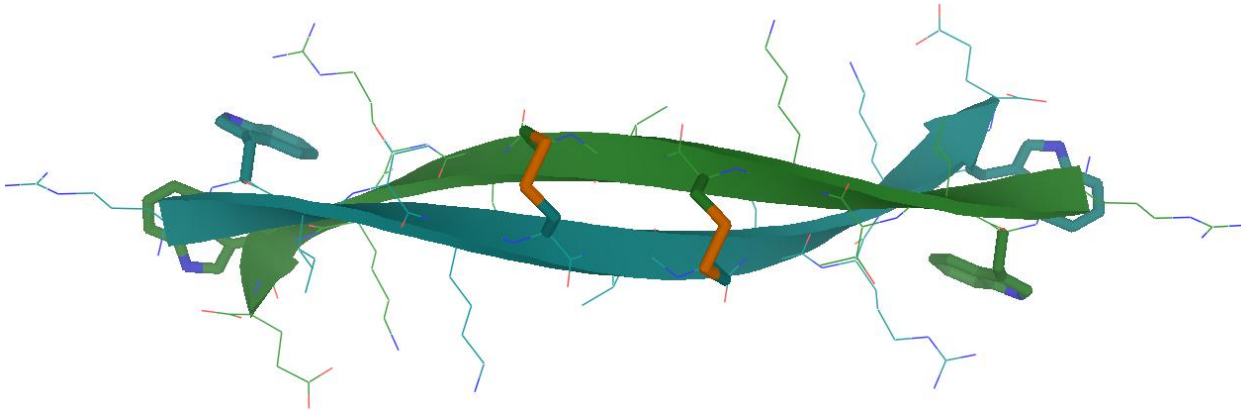

**S2b (below):** The C6/C8 heterodimer. Sequence **RWITK**C**ISIRKWE** + **RWITK**S**ICIRKWE**.

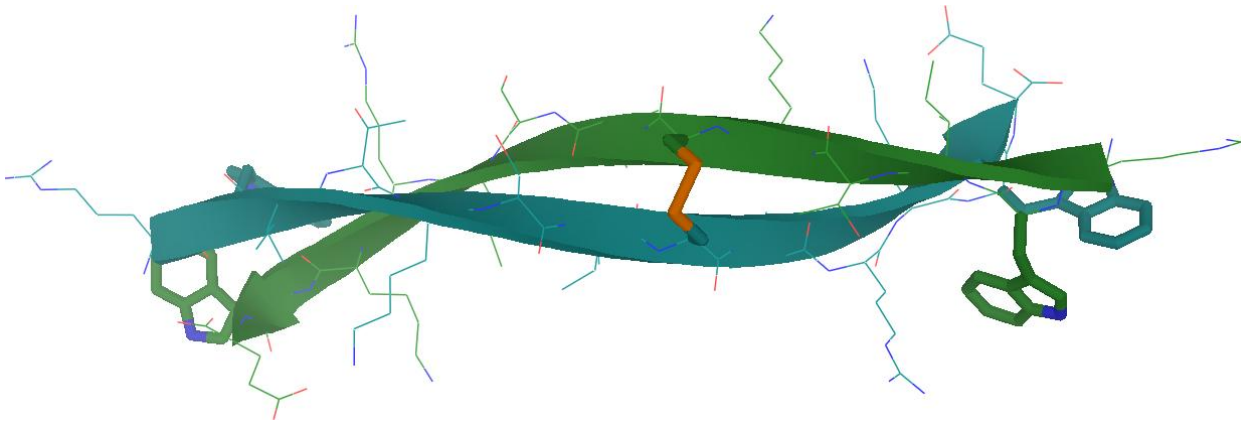

**S2c (below):** The C6 homodimer, or “good” diagonal disulfide. Sequence **(RWITK**C**ISIRKWE)**<sub>2</sub>

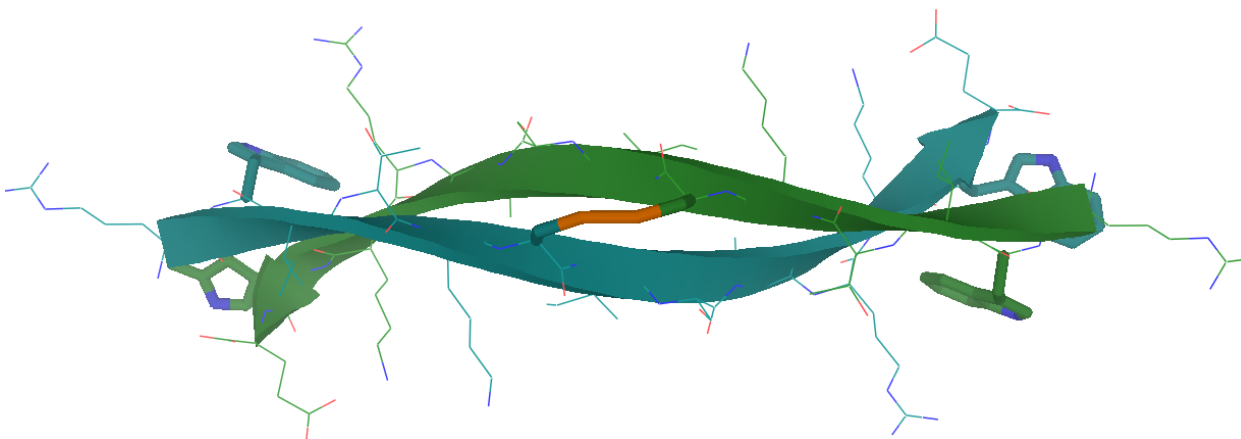

**S2d (below):** The C8 homodimer (the “bad” diagonal disulfide, sequence (RWITKSI**C**IRKWE)<sub>2</sub>). Note: this model is **NOT** NOE-validated; this is the closest potential fit to the NOEs for the dimer. A dimer of dimers (or other oligomer) is required to explain folding of this peptide at NMR concentrations. Note the distorted / bulged sheets and the strained disulfide.

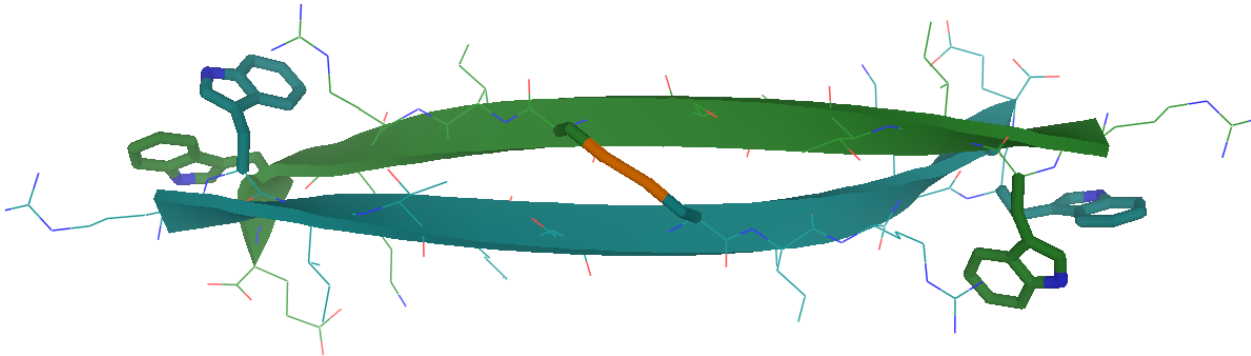

**Figure S3 (below):** Proposed folding landscape for long loop peptides with a central disulfide (as the oxidized homodimer); the blue chain is labeled AB (A at Nterm, B at Cterm) and the identical green chain is A'B'. By NMR, we observed only the two equivalent fully-folded states (and perhaps a percent or so of the partly-unfolded states) for peptide (RWITVTIGGGG**C**GGGGKKIRVWE)<sub>2</sub> at 280K. The reduced species (chain AB alone; no A'B') can only access one of the two equivalent folded states and only one of the four equivalent folding pathways (the pathway on the far left). Thus, despite what are almost assuredly identical energies (per chain) for the folded state, its melting point is decreased by circa 8 degrees.

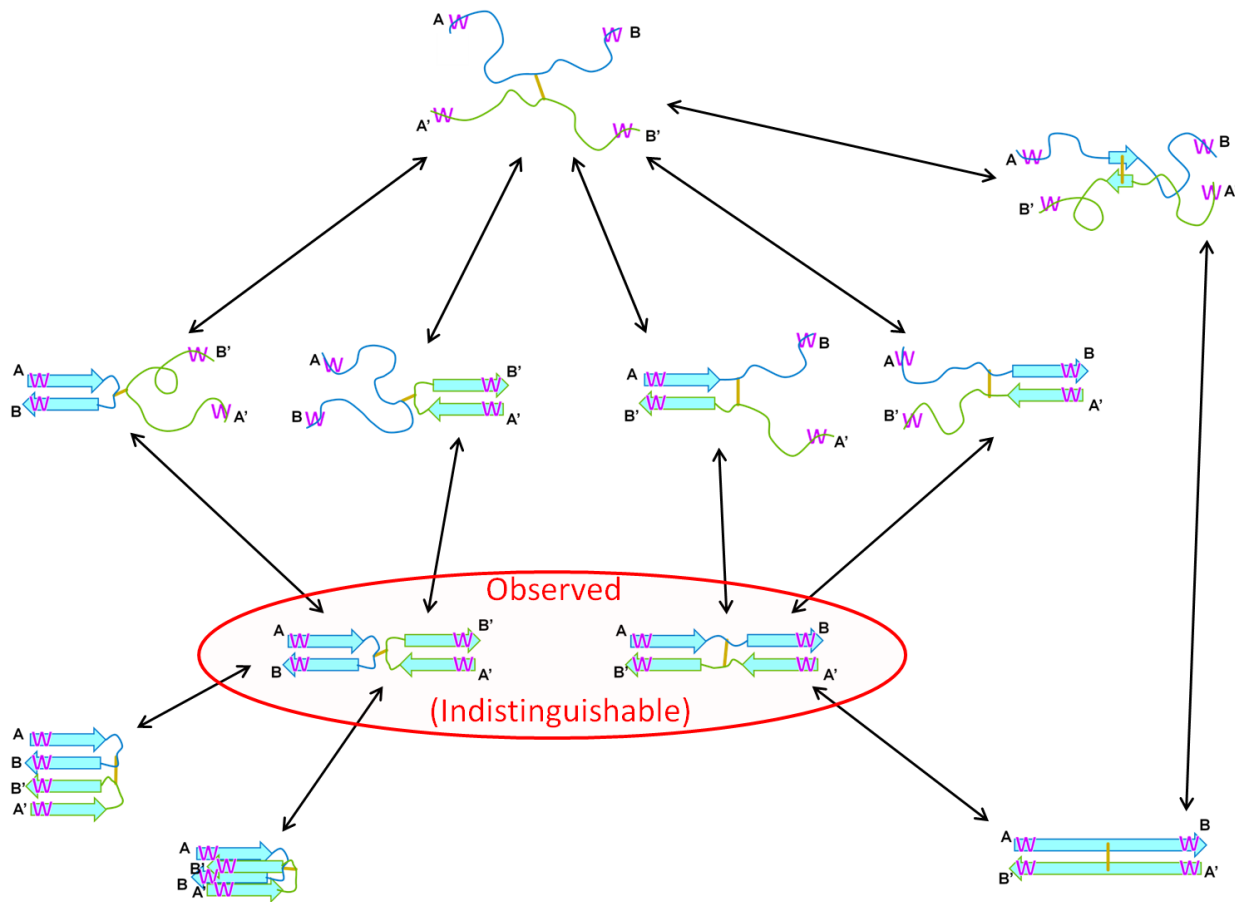

**Figure S4:** Circular Dichroism melts (as the 228 nm exciton couplet resulting from the Trp/Trp interaction(s)) for peptide RWITVTIGGGGCGGGGKKIRVWE, oxidized (dimerized) and reduced (monomeric). Concentration of 30 micromolar of peptide chain was used. (Total concentration of 15 micromolar of oxidized dimer.)

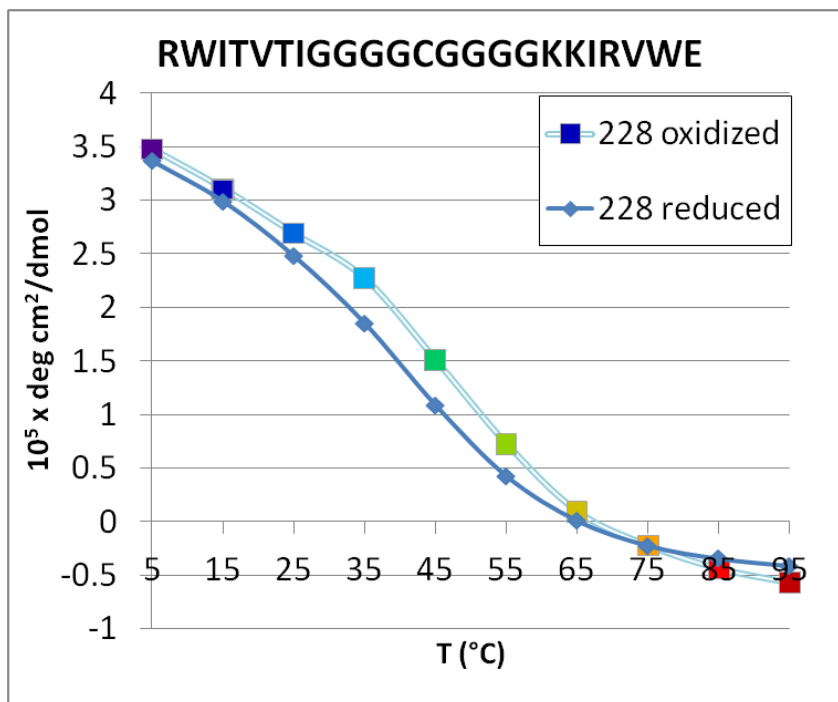

**Figure S5 (below):** H<sub>N</sub> and H<sub>α</sub> CSD comparison for peptides of the form (RWITVTIGGGGCGGGGKKIRVWE)<sub>n</sub>

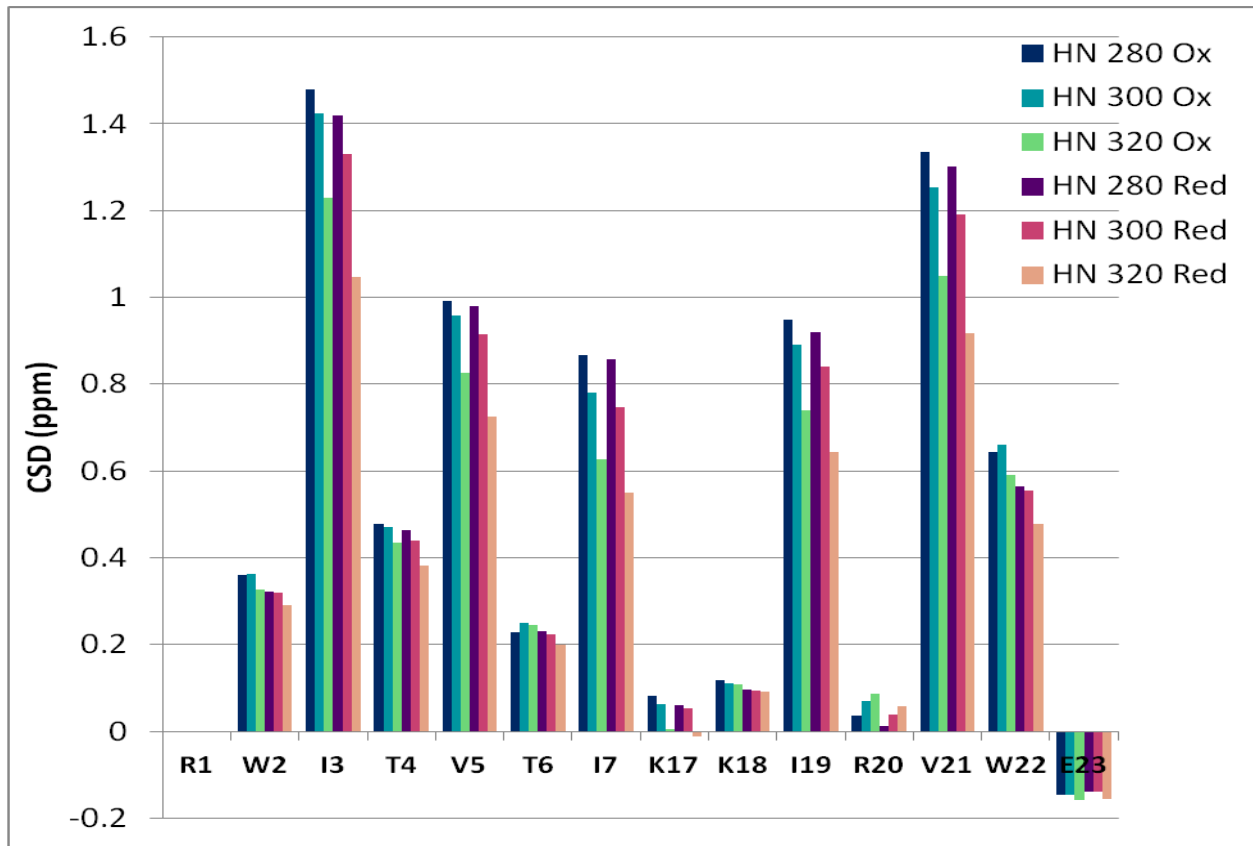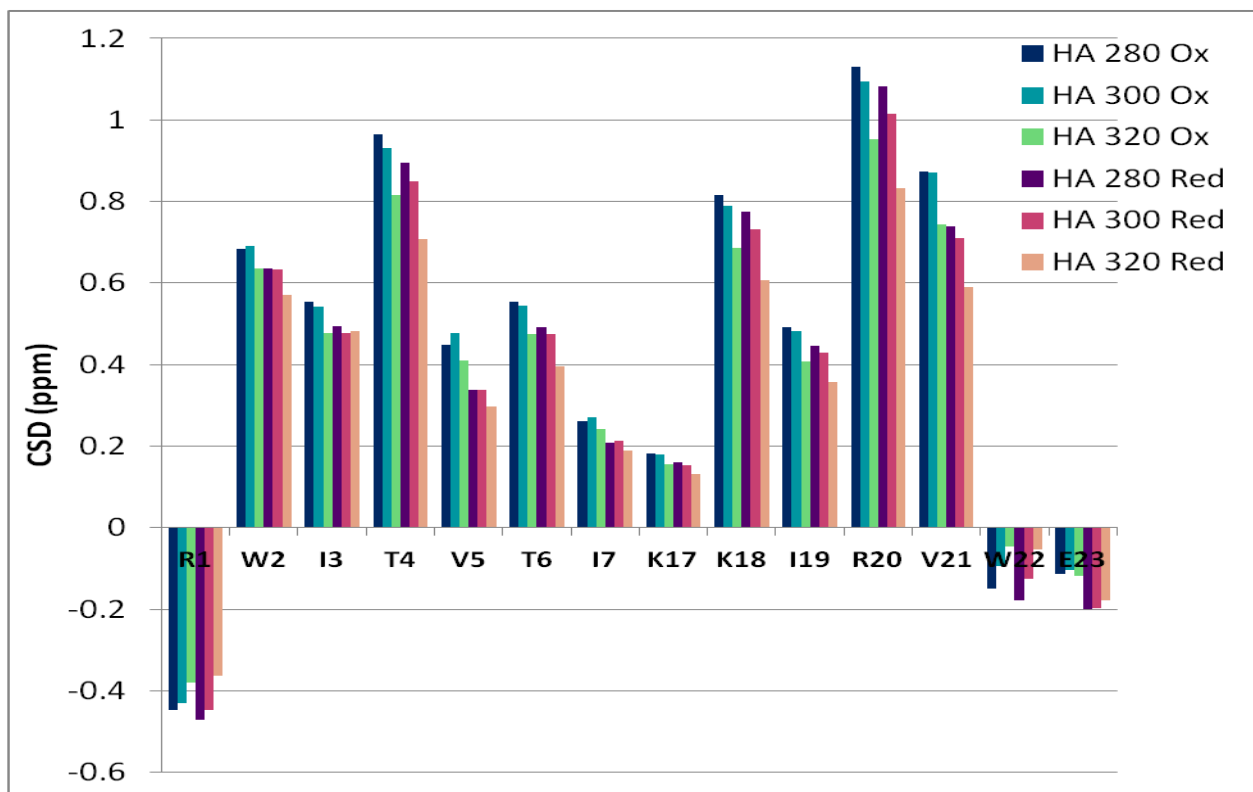

**Figure S6, below:** Chemical shift deviations for oxidized peptides of the form **RWITKXXXIRKWE**. (280K, pH 6)

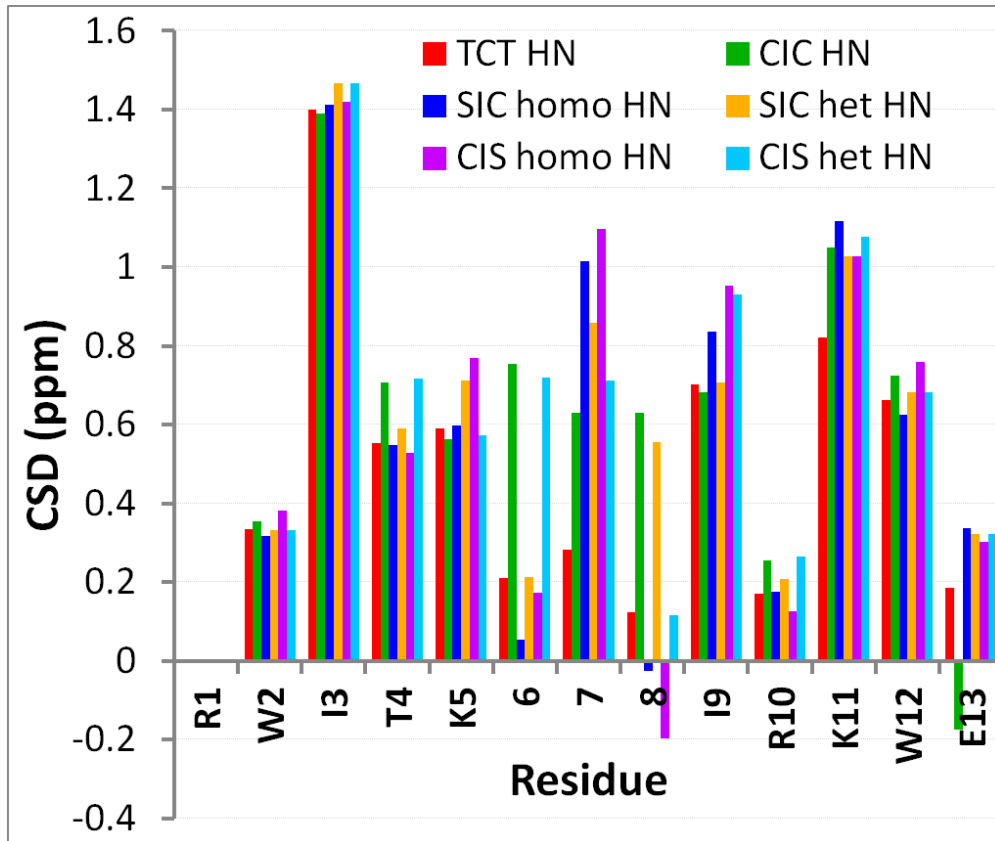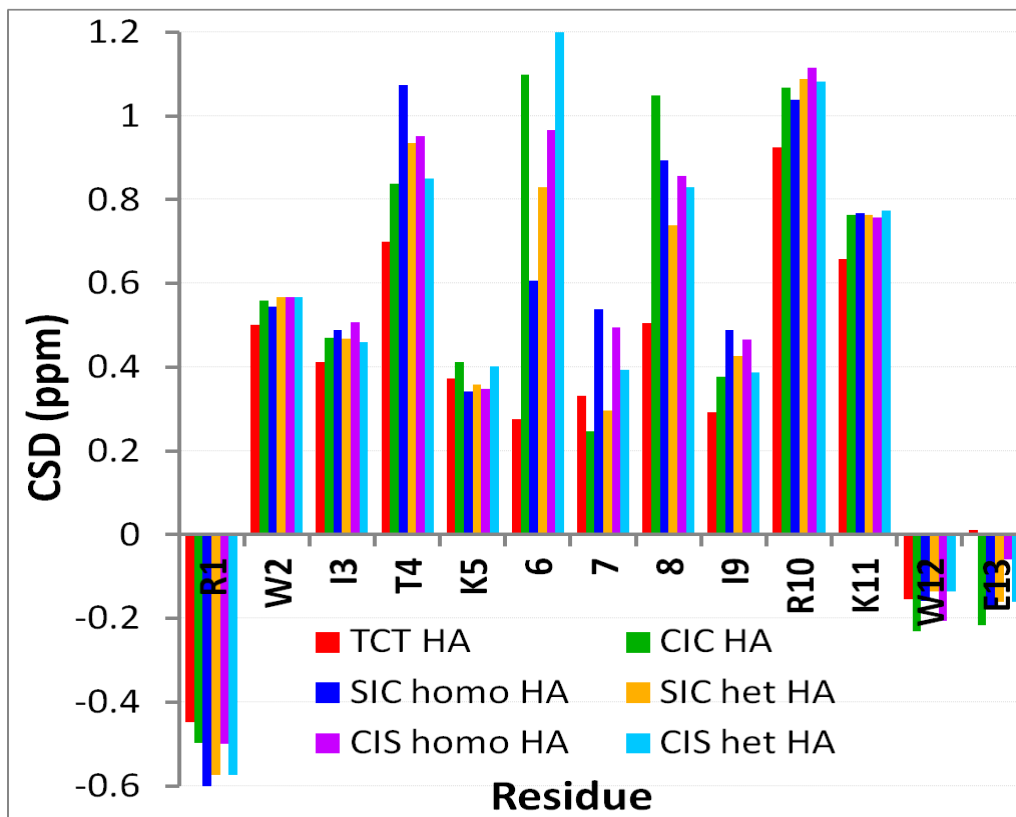

**Figure S7:** Backbone chemical shift deviations (CSDs) for  $(XWX\text{C}XWX)_n$  peptides. (Raw data appears in table S1.)

**S7a (below):**  $H_N$  CSDs

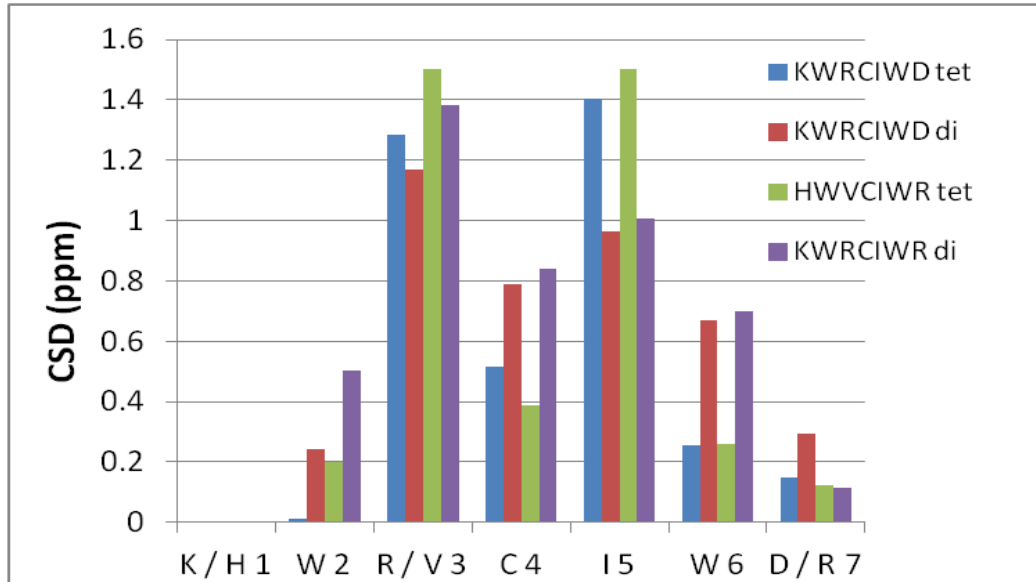

**S7b (below):**  $H_\alpha$  CSDs.

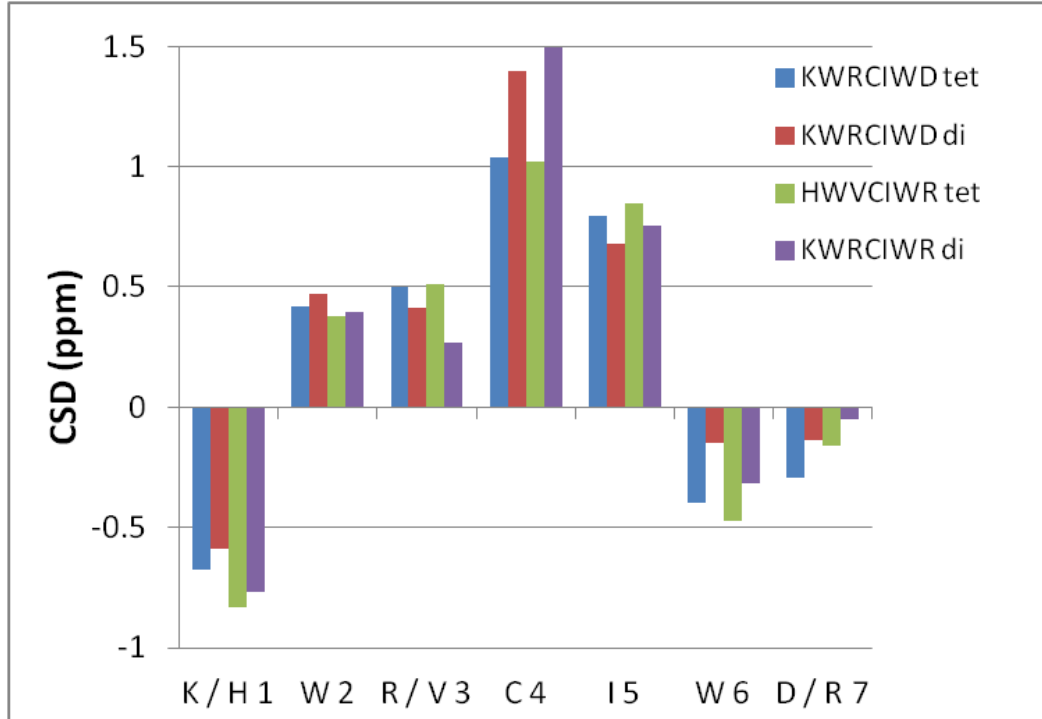



**Figure S8:** CD Melt (228nm) of KWRCIWD. (Note that dimers and tetramers cannot be distinguished here, and are expected to yield similar CD spectra. However, the concentration used for CD is circa 2 orders of magnitude lower than that for NMR; thus the predominance of dimer is expected. This is especially true since dimer and tetramer exist in roughly equal proportions at 280K, 1 mM, as measured by NMR peak integrals.)

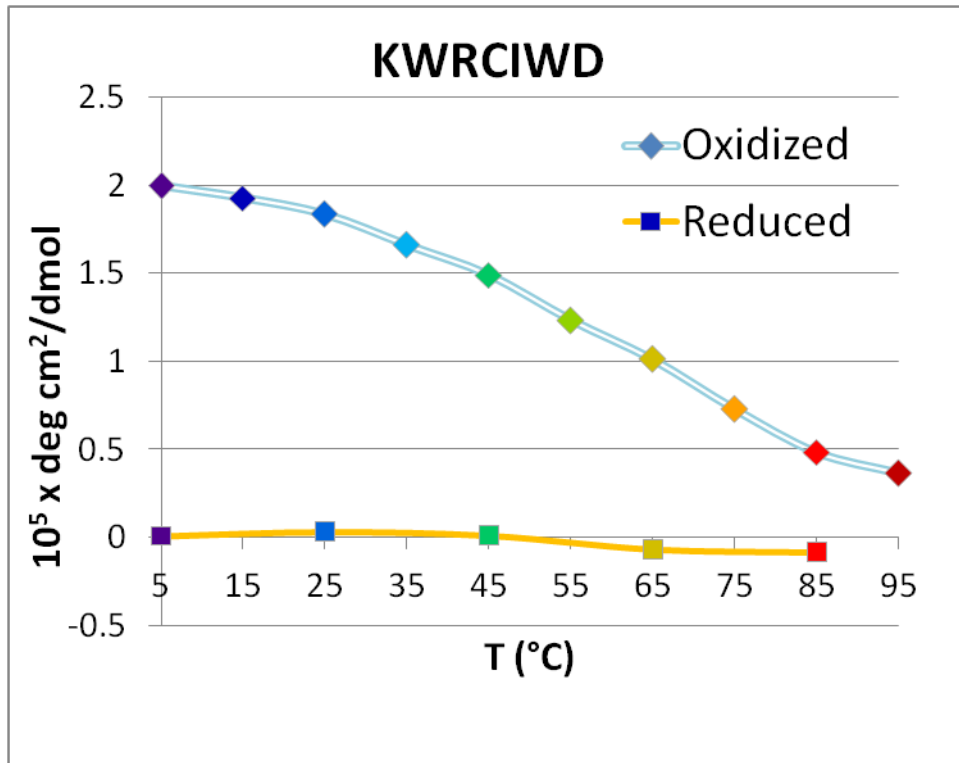

**Figure S9a:** Dilution data for peptide (RWRCIWY)<sub>2</sub>. A 25-fold dilution of a 3mM sample results in much cleaner lineshapes, and the disappearance of the 2<sup>nd</sup> set of peaks. Complete assignments determined by 2D NMR. Note that the relative intensity, or even the existence, of a 2<sup>nd</sup> set of peaks at high concentration (~3-5 mM) varies for peptides of the form (XWXCXWX)<sub>2</sub>. Since our best-guess structure for a tetramer places all “X” residues on the exterior, they should theoretically have little impact on the propensity for higher-order association, but we have shown that their impact is non-negligible. In decreasing order from “more higher-order assembly” to “mostly/only dimer”: (KWRCIWD)<sub>2</sub> = (HWVCIWR)<sub>2</sub> > (RWRCIWY)<sub>2</sub> > (HWHCIWD)<sub>2</sub>. A distinct, second set of peaks was never observed for longer beta ribbons, reduced species, or peptides of the form (Ac-WXCXWTGP...)<sub>n</sub>. (Ac=Acetyl, or also Propanoyl.)

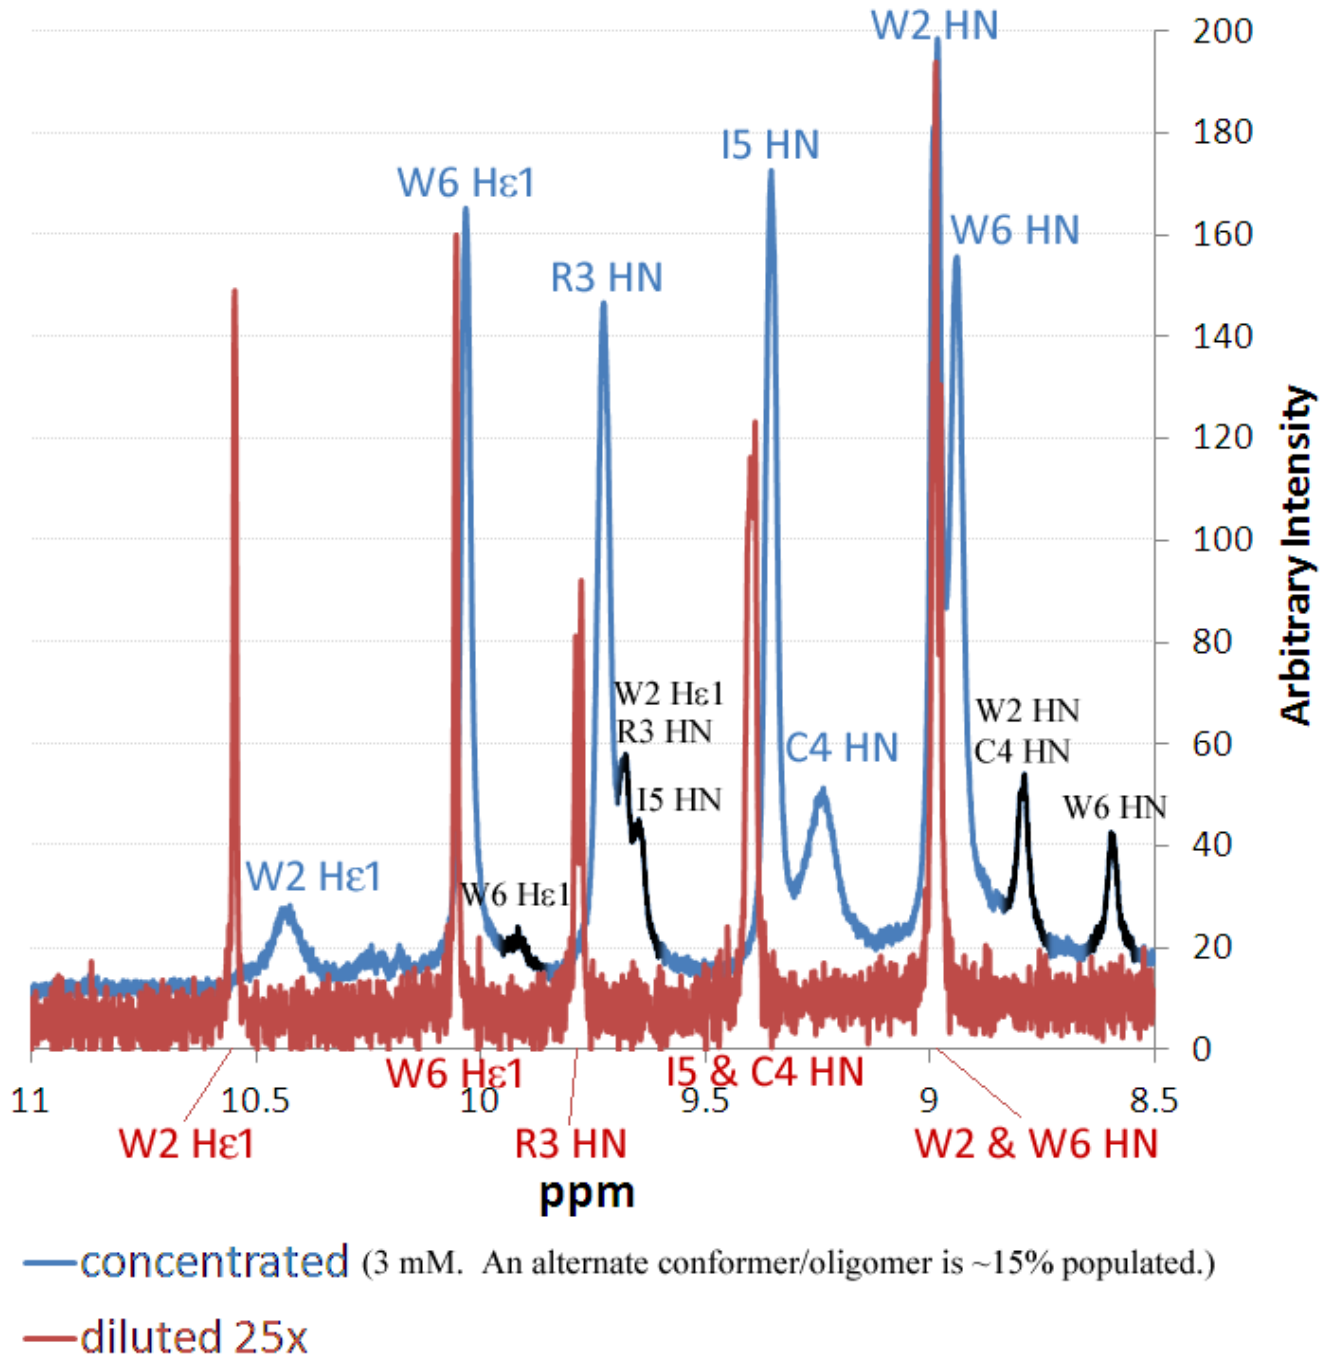

**Figure S9b:** Higher temperatures resulted in sharper lineshapes for all peaks, and a slight decrease in the relative intensity of the 2<sup>nd</sup> set of peaks. This is suggestive of two equilibrium processes: rapid docking and undocking of the dominant C2 dimer, and slower disulfide-swapping exchange (proposed mechanism in figure S10).

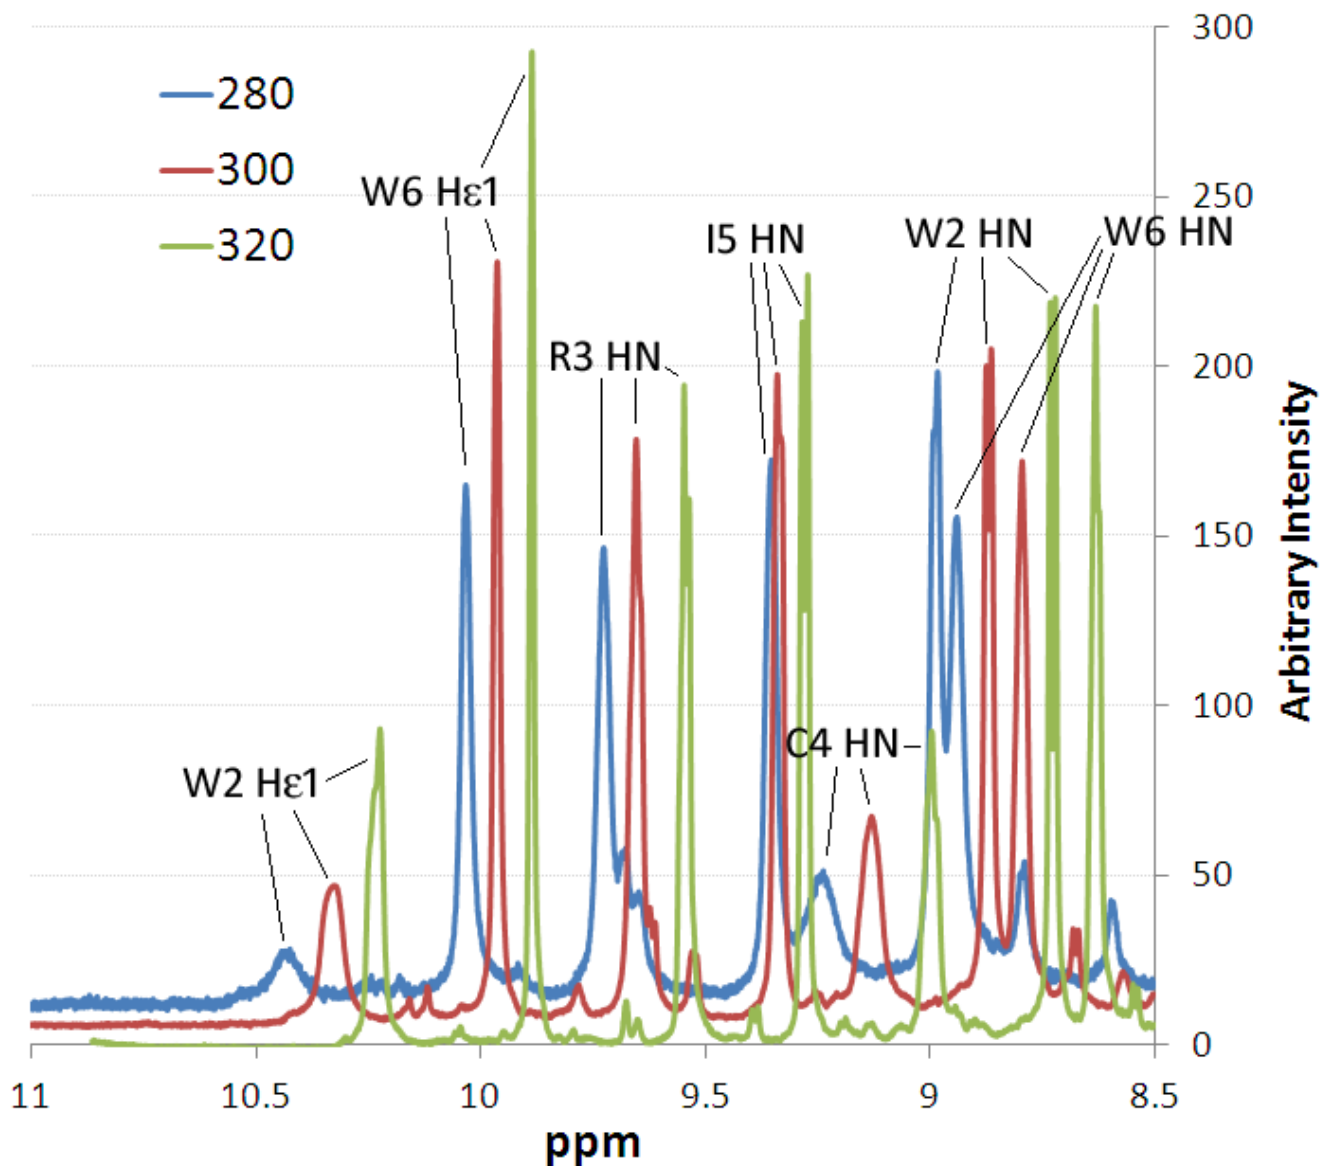

**Figure S10:** Proposed mechanism for the higher-order assembly of oxidized beta sheet peptides of the form  $(XWXCXWX)_2$ . The lowest-energy conformation for a tetrameric species involves face-to-face disulfide bonds; these impose less strain on the beta sheets vs. cross-strand edge-to-edge disulfides, and allow for more efficient packing of the hydrophobic W.C.W faces. Broadened lineshapes of the dimer peaks at high concentration suggest a less-efficient tetramerization (or other oligomerization) event with moderately fast interconversion, while the appearance of an entirely new set of peaks suggests a slowly-interconverting species with different disulfide connectivity. To convert between the two tetramers, the peptide must first unfold, then reassemble/refold. The structure shown for the “swapped” tetramer (bottom right) is our best guess from available data, but will require crystallographic methods to explicitly derive.

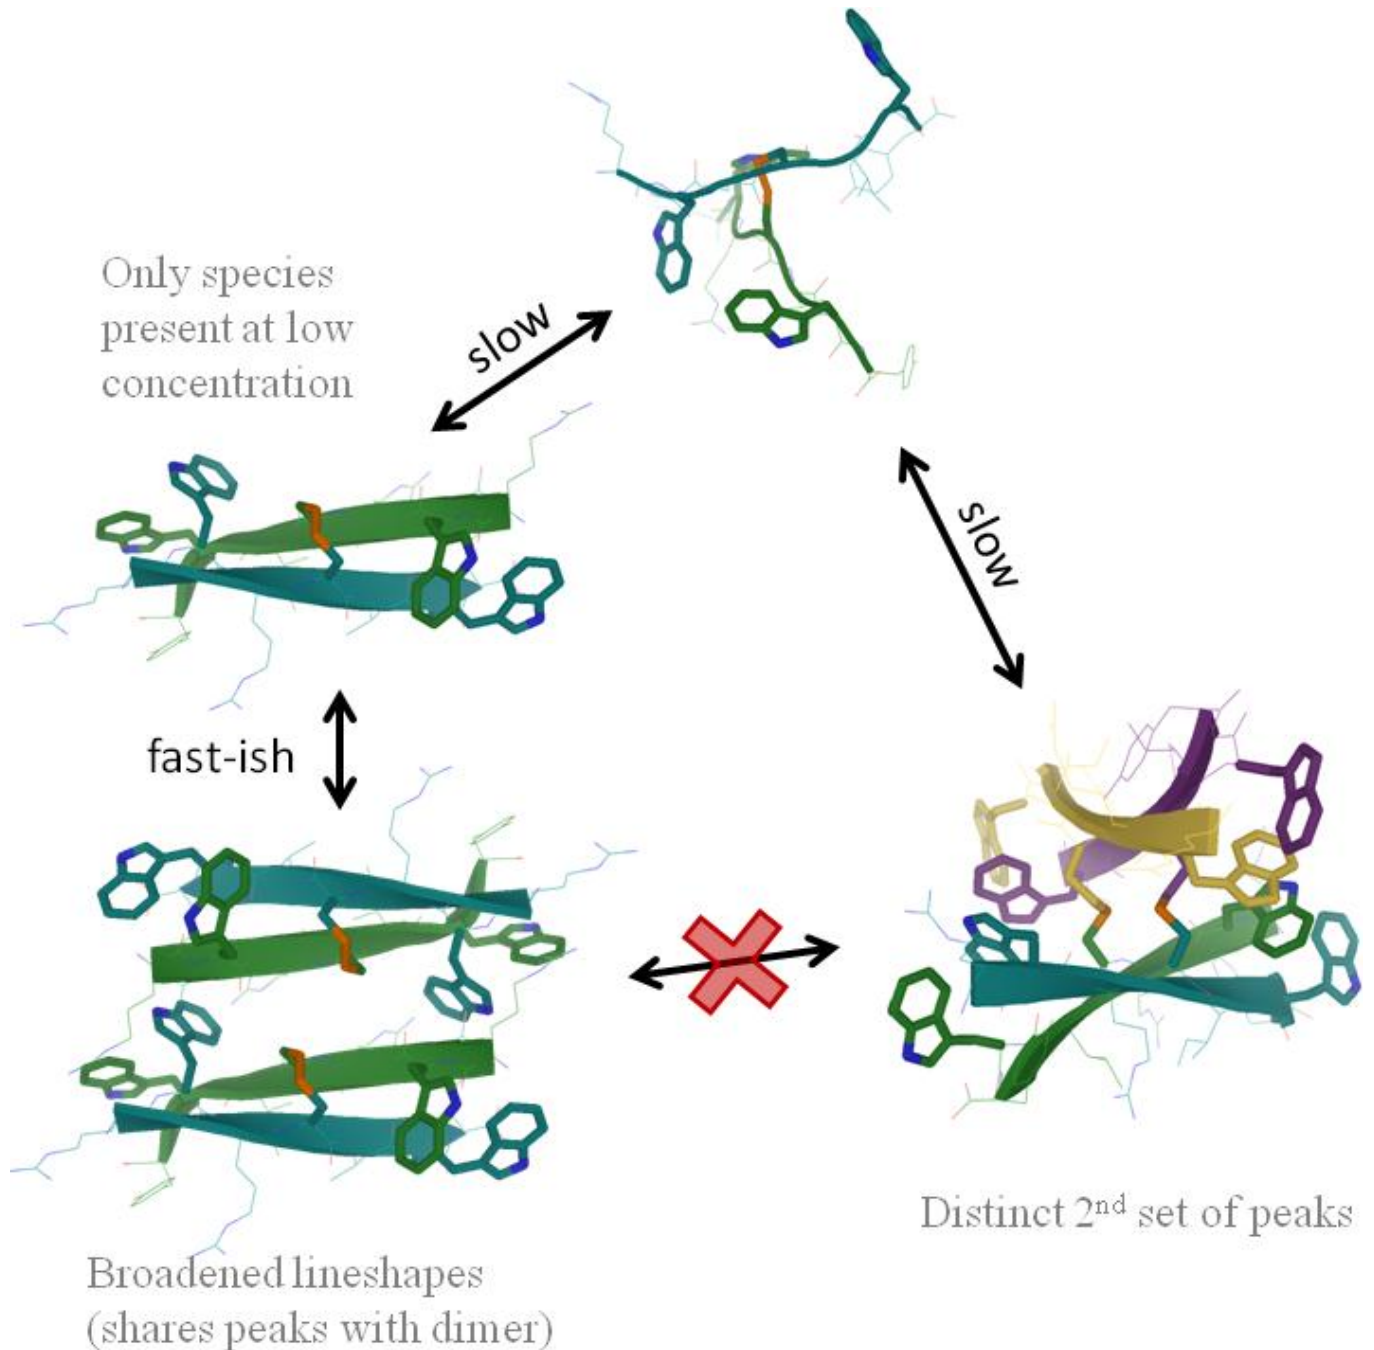

**Figure S11:** Structural data for double-hairpin peptide (RWICRWDEKSGRWITKKID)<sub>2</sub> **a)** Designed structure; validated by 2D NMR NOEs & CSDs. Selected, structurally diagnostic NOEs are marked as orange lines (intrachain) and purple lines (interchain). **b)** A slice of the NOESY spectra showing the structurally-diagnostic contacts highlighted in the upper panel, here as raw NOEs. (Complete NOEs are given in table S11.)

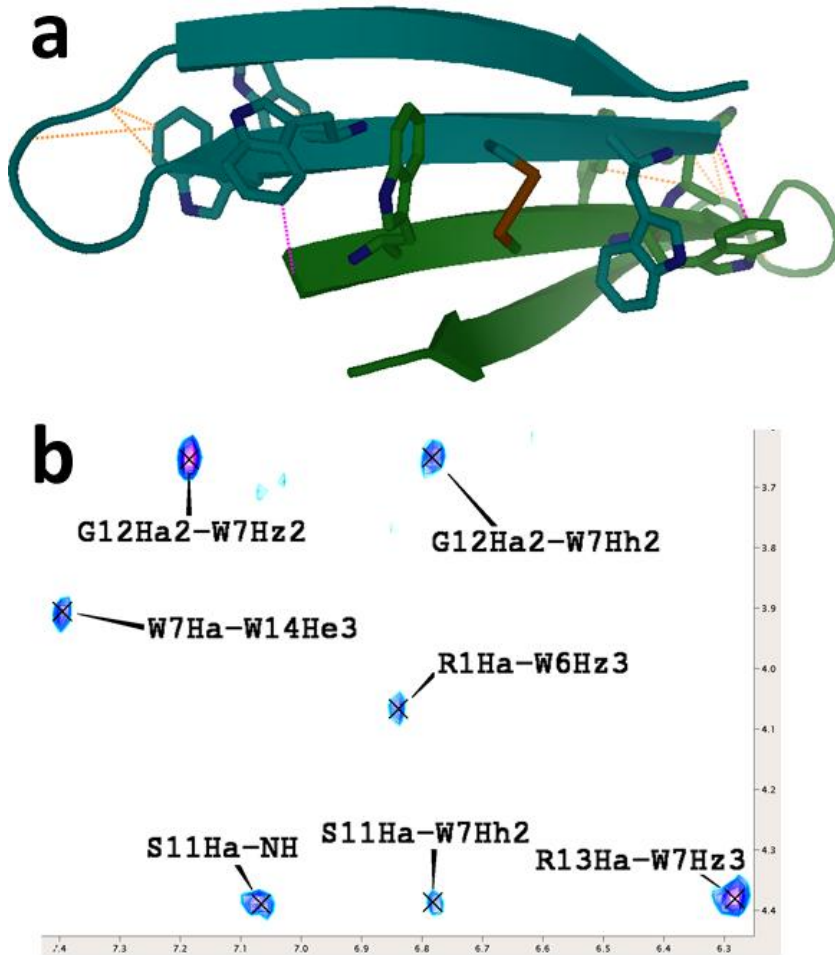

**Table S1a:** backbone chemical shift deviations for pP: (KWRWRTR<sub>p</sub>PRKIKRWY)<sub>2</sub>

Chemical shift deviations highlighted in bold were used to calculate fold population. (100% values defined as the very-well-folded CIC peptide @ 280K, plus 2%.)

|      | HN 280       | HA 280        | HN 300       | HA 300       | HN 320       | HA 320        |
|------|--------------|---------------|--------------|--------------|--------------|---------------|
| K1   |              | <b>-0.556</b> |              | <b>-0.52</b> |              | <b>-0.491</b> |
| W2   | -0.054       | <b>0.704</b>  |              | <b>0.647</b> |              | <b>0.501</b>  |
| R3   | <b>1.005</b> | <b>0.479</b>  | <b>0.928</b> | <b>0.431</b> | <b>0.769</b> | <b>0.381</b>  |
| W4   | <b>0.954</b> | <b>0.704</b>  | <b>0.887</b> | <b>0.712</b> | <b>0.688</b> | <b>0.637</b>  |
| R5   | <b>1.367</b> | <b>0.534</b>  | <b>1.323</b> | <b>0.513</b> | <b>1.13</b>  | <b>0.442</b>  |
| T6   | <b>0.824</b> | <b>0.63</b>   | <b>0.765</b> | <b>0.639</b> | <b>0.654</b> | <b>0.593</b>  |
| R7   | <b>0.708</b> | 0.285         | <b>0.675</b> | 0.273        | <b>0.574</b> | 0.255         |
|      |              |               |              |              |              |               |
| dPro | -----        | 0.068         |              | 0.068        |              | 0.065         |
| Pro  | -----        | 0.121         |              | 0.127        |              | 0.125         |
| R10  | -0.631       | 0.253         | -0.557       | 0.23         | -0.396       | 0.181         |
| K11  | 0.121        | <b>0.813</b>  | 0.138        | <b>0.76</b>  | 0.144        | <b>0.626</b>  |
| I12  | <b>0.977</b> | <b>0.558</b>  | <b>0.943</b> | <b>0.521</b> | <b>0.785</b> | <b>0.44</b>   |
| K13  | 0.189        | 0.124         | 0.204        | 0.135        | 0.185        | 0.12          |
| R14  | <b>0.698</b> | <b>0.587</b>  | <b>0.635</b> | <b>0.533</b> | <b>0.439</b> | <b>0.402</b>  |
| W15  | <b>0.632</b> | 0.056         | <b>0.588</b> | 0.064        | <b>0.444</b> | 0.071         |
| Y16  | 0.411        | -0.153        | 0.407        | -0.122       | 0.395        | -0.076        |

**Table S1b:** backbone chemical shift deviations for C: (KWRWRTR<sub>C</sub>PRKIKRWY)<sub>2</sub>

|     | HN 280       | HA 280        | HN 300       | HA 300        | HN 320       | HA 320        |
|-----|--------------|---------------|--------------|---------------|--------------|---------------|
| K1  |              | <b>-0.584</b> |              | <b>-0.543</b> |              | <b>-0.473</b> |
| W2  | -0.047       | <b>0.72</b>   | -0.053       | <b>0.685</b>  |              | <b>0.563</b>  |
| R3  | <b>1.029</b> | <b>0.517</b>  | <b>0.984</b> | <b>0.473</b>  | <b>0.821</b> | <b>0.397</b>  |
| W4  | <b>0.994</b> | <b>0.775</b>  | <b>0.95</b>  | <b>0.783</b>  | <b>0.765</b> | <b>0.698</b>  |
| R5  | <b>1.267</b> | <b>0.531</b>  | <b>1.283</b> | <b>0.521</b>  | <b>1.134</b> | <b>0.442</b>  |
| T6  | <b>0.918</b> | <b>0.629</b>  | <b>0.881</b> | <b>0.66</b>   | <b>0.752</b> | <b>0.622</b>  |
| R7  | <b>0.781</b> | 0.447         | <b>0.767</b> | 0.447         | <b>0.655</b> | 0.395         |
|     |              |               |              |               |              |               |
| C8  | 0.891        | 1.123         | 0.866        | 1.11          | 0.81         | 1.005         |
|     |              |               |              |               |              |               |
| R9  | 0.484        | 0.395         | 0.523        | 0.386         | 0.479        | 0.339         |
| K10 | 0.34         | <b>0.823</b>  | 0.362        | <b>0.816</b>  | 0.35         | <b>0.705</b>  |
| I11 | <b>1.128</b> | <b>0.597</b>  | <b>1.119</b> | <b>0.578</b>  | <b>0.933</b> | <b>0.494</b>  |
| K12 | 0.131        | 0.139         | 0.173        | 0.154         | 0.173        | 0.144         |

|            |              |              |              |              |              |             |
|------------|--------------|--------------|--------------|--------------|--------------|-------------|
| <b>R13</b> | <b>0.713</b> | <b>0.601</b> | <b>0.675</b> | <b>0.571</b> | <b>0.5</b>   | <b>0.46</b> |
| <b>W14</b> | <b>0.666</b> | 0.044        | <b>0.647</b> | 0.055        | <b>0.511</b> | 0.062       |
| <b>Y15</b> | 0.397        | -0.166       | 0.416        | -0.135       | 0.336        | -0.091      |

**Table S1c:** backbone chemical shift deviations for CIC: (KWRWRTRCICRRIKRWY)<sub>2</sub>

|       | HN 280       | HA 280        | HN 300       | HA 300        | HN 320       | HA 320        |
|-------|--------------|---------------|--------------|---------------|--------------|---------------|
| Lys1  |              | <b>-0.592</b> |              | <b>-0.549</b> |              | <b>-0.494</b> |
| Trp2  | -0.052       | <b>0.732</b>  | -0.049       | <b>0.705</b>  | -0.049       | <b>0.646</b>  |
| Arg3  | <b>1.03</b>  | <b>0.527</b>  | <b>1.004</b> | <b>0.481</b>  | <b>0.917</b> | <b>0.45</b>   |
| Trp4  | <b>0.993</b> | <b>0.788</b>  | <b>0.964</b> | <b>0.806</b>  | <b>0.881</b> | <b>0.793</b>  |
| Arg5  | <b>1.25</b>  | <b>0.534</b>  | <b>1.279</b> | <b>0.53</b>   | <b>1.257</b> | <b>0.51</b>   |
| Thr6  | <b>0.869</b> | <b>0.63</b>   | <b>0.846</b> | <b>0.655</b>  | <b>0.806</b> | <b>0.674</b>  |
| Arg7  | <b>0.773</b> | 0.442         | <b>0.782</b> | 0.432         | <b>0.763</b> | 0.428         |
| Cys8  | 0.89         | 1.028         | 0.888        | 1.061         | 0.866        | 1.085         |
| Ile9  | 0.566        | 0.256         | 0.637        | 0.275         | 0.716        | 0.293         |
| Cys10 | 0.827        | 1.093         | 0.787        | 1.103         | 0.749        | 1.094         |
| Arg11 | 0.413        | 0.404         | 0.455        | 0.398         | 0.486        | 0.388         |
| Lys12 | 0.327        | <b>0.79</b>   | 0.352        | <b>0.795</b>  | 0.372        | <b>0.766</b>  |
| Ile13 | <b>1.127</b> | <b>0.594</b>  | <b>1.133</b> | <b>0.597</b>  | <b>1.086</b> | <b>0.561</b>  |
| Lys14 | 0.116        | 0.151         | 0.158        | 0.172         | 0.19         | 0.185         |
| Arg15 | <b>0.707</b> | <b>0.614</b>  | <b>0.684</b> | <b>0.592</b>  | <b>0.611</b> | <b>0.542</b>  |
| Trp16 | <b>0.69</b>  | 0.06          | <b>0.681</b> | 0.065         | <b>0.63</b>  | 0.07          |
| Tyr17 | 0.393        | -0.157        | 0.415        | -0.133        | 0.394        | -0.103        |

**Table S1d:** backbone chemical shift deviations for Half: KWRWRTRCR + RCRRIKRWY. (Note: due to poor lineshapes resulting from moderately slow folding rate and intermediate fold populations, not all positions could be definitively assigned.)

|           | HN 280       | HA 280        | HN 300       | HA 300        | HN 320       | HA 320        |
|-----------|--------------|---------------|--------------|---------------|--------------|---------------|
| <b>K1</b> |              | <b>-0.498</b> |              | <b>-0.423</b> |              | <b>-0.329</b> |
| <b>W2</b> | -0.026       | <b>0.623</b>  | -0.052       | <b>0.458</b>  |              | <b>0.203</b>  |
| <b>R3</b> |              | <b>0.422</b>  |              | <b>0.32</b>   |              |               |
| <b>W4</b> |              | <b>0.651</b>  |              | <b>0.515</b>  |              | <b>0.341</b>  |
| <b>R5</b> | <b>1.121</b> | <b>0.449</b>  | <b>0.895</b> | <b>0.333</b>  |              |               |
| <b>T6</b> | <b>0.836</b> | <b>0.537</b>  | <b>0.653</b> | <b>0.45</b>   |              | <b>0.272</b>  |
| <b>R7</b> | <b>0.703</b> | 0.363         | <b>0.538</b> | 0.303         |              |               |
| <b>C8</b> | 0.79         | 0.675         |              | 0.536         |              | 0.295         |
| <b>R9</b> | 0.168        | 0.074         | 0.202        | 0.058         | 0.215        | 0.051         |
| <b>R1</b> |              |               |              |               |              |               |
| <b>C2</b> |              | 0.728         |              | 0.58          |              | 0.336         |
| <b>R3</b> | 0.278        | 0.298         | 0.251        | 0.237         |              |               |
| <b>K4</b> | 0.298        | <b>0.666</b>  | 0.269        | <b>0.512</b>  |              |               |
| <b>I5</b> | <b>0.966</b> | <b>0.514</b>  | <b>0.719</b> | <b>0.391</b>  | <b>0.375</b> | <b>0.196</b>  |

|           |              |              |             |              |              |        |
|-----------|--------------|--------------|-------------|--------------|--------------|--------|
| <b>K6</b> | 0.137        | 0.127        | 0.129       | 0.099        |              | 0.138  |
| <b>R7</b> | <b>0.642</b> | <b>0.507</b> | <b>0.42</b> | <b>0.367</b> |              |        |
| <b>W8</b> | <b>0.534</b> | 0.063        | <b>0.36</b> | 0.068        | <b>0.075</b> | 0.077  |
| <b>Y9</b> | 0.31         | -0.132       | 0.294       | -0.079       | 0.166        | -0.008 |

**Table S1e:** Key C-term Trp (the shifted “edge” Trp of the edge-to-face interaction) chemical shift deviations for peptides of the form: KWRWRTR (X) RKIKRWY

|        | H $\beta$ 3 280 | H $\beta$ 3 300 | H $\beta$ 3 320 | H $\epsilon$ 3 280 | H $\epsilon$ 3 300 | H $\epsilon$ 3 320 | H $\zeta$ 3 280 | H $\zeta$ 3 300 | H $\zeta$ 3 320 |
|--------|-----------------|-----------------|-----------------|--------------------|--------------------|--------------------|-----------------|-----------------|-----------------|
| pP     | <b>-0.733</b>   | <b>-0.685</b>   | <b>-0.553</b>   | <b>-1.881</b>      | <b>-1.646</b>      | <b>-1.184</b>      | <b>-0.559</b>   | <b>-0.503</b>   | <b>-0.376</b>   |
| C      | <b>-0.748</b>   | <b>-0.714</b>   | <b>-0.596</b>   | <b>-2.015</b>      | <b>-1.805</b>      | <b>-1.384</b>      | <b>-0.592</b>   | <b>-0.547</b>   | <b>-0.443</b>   |
| CIC    | <b>-0.72</b>    | <b>-0.704</b>   | <b>-0.654</b>   | <b>-2.025</b>      | <b>-1.857</b>      | <b>-1.629</b>      | <b>-0.601</b>   | <b>-0.567</b>   | <b>-0.518</b>   |
| C_half | <b>-0.671</b>   | <b>-0.512</b>   | <b>-0.265</b>   | <b>-1.703</b>      |                    |                    | <b>-0.477</b>   | <b>-0.333</b>   | <b>-0.131</b>   |

**Table S2a:** 280K backbone chemical shift *deviations* for Oxidized (KWRCIWD)<sub>n</sub> and (HWVCIWR)<sub>n</sub> peptides.

|       | KWRCIWD Tet |            | KWRCIWD Di |            | HWVCIWR Tet |            | HWVCIWR Di |            |
|-------|-------------|------------|------------|------------|-------------|------------|------------|------------|
|       | HN          | H $\alpha$ | HN         | H $\alpha$ | HN          | H $\alpha$ | HN         | H $\alpha$ |
| K / H |             | -0.678     |            | -0.591     |             | -0.834     |            | -0.77      |
| W     | 0.011       | 0.419      | 0.243      | 0.47       | 0.199       | 0.377      | 0.504      | 0.397      |
| R / V | 1.283       | 0.499      | 1.17       | 0.412      | 1.503       | 0.509      | 1.383      | 0.27       |
| C     | 0.517       | 1.036      | 0.787      | 1.399      | 0.387       | 1.022      | 0.84       | 1.493      |
| I     | 1.405       | 0.796      | 0.966      | 0.678      | 1.504       | 0.849      | 1.005      | 0.755      |
| W     | 0.255       | -0.399     | 0.669      | -0.149     | 0.258       | -0.47      | 0.699      | -0.316     |
| D / R | 0.148       | -0.291     | 0.293      | -0.137     | 0.122       | -0.16      | 0.112      | -0.053     |

**Table S2b:** 280K backbone chemical shifts for Oxidized (KWRCIWD)<sub>n</sub> and (HWVCIWR)<sub>n</sub> peptides.

|       | KWRCIWD Tet |            | KWRCIWD Di |            | HWVCIWR Tet |            | HWVCIWR Di |            |
|-------|-------------|------------|------------|------------|-------------|------------|------------|------------|
|       | HN          | H $\alpha$ | HN         | H $\alpha$ | HN          | H $\alpha$ | HN         | H $\alpha$ |
| K / H |             | 3.337      |            | 3.424      |             | 3.589      |            | 3.653      |
| W     | 8.759       | 5.072      | 8.991      | 5.123      | 8.987       | 5.03       | 9.292      | 5.05       |
| R / V | 9.63        | 4.804      | 9.517      | 4.717      | 9.7         | 4.588      | 9.58       | 4.349      |
| C     | 8.875       | 5.465      | 9.145      | 5.828      | 8.745       | 5.451      | 9.198      | 5.922      |
| I     | 9.622       | 4.915      | 9.183      | 4.797      | 9.721       | 4.968      | 9.222      | 4.874      |
| W     | 8.543       | 4.254      | 8.957      | 4.504      | 8.546       | 4.183      | 8.987      | 4.337      |
| D / R | 8.036       | 4.142      | 8.181      | 4.296      | 7.91        | 3.975      | 7.9        | 4.082      |



**Table S2c:** 280K Trp sidechain chemical shifts for Oxidized (KWRCIWD)<sub>n</sub> and (HWVCIWR)<sub>n</sub> peptides.

|        | KWRCIWD 1 | KWRCIWD 2 | HWVCIWR 1 | KWRCIWR 2 |
|--------|-----------|-----------|-----------|-----------|
| W2 Hβ3 | -0.531    | -0.126    | -0.562    | -0.125    |
| W2 Hδ1 | -0.463    | 0.259     | -0.619    | 0.355     |
| W2 Hε1 | -0.651    | 0.167     | -0.583    | 0.288     |
| W2 Hε3 | -0.479    | -0.329    |           | -0.303    |
| W5 Hβ2 | -0.65     | -0.377    | -0.651    | -0.445    |
| W5 Hβ3 | -1.713    | -1.11     | -1.619    | -1.193    |
| W5 Hδ1 | -0.397    | -0.272    | -0.389    | -0.312    |
| W5 Hε1 | -0.204    | -0.136    | -0.126    | -0.075    |
| W5 Hε3 | -2.559    | -2.288    | -2.657    | -2.517    |
| W5 Hζ2 | -0.092    | -0.064    | -0.084    | -0.042    |
| W5 Hζ3 | -0.516    | -0.619    | -0.545    | -0.638    |
| W5 Hη3 | -0.117    | -0.124    | -0.134    | -0.098    |

Intra-residue cross-indole NOEs (impossible for the monomer and dimer; not tetramer) were observed between W2 Hδ1 and W2 Hζ3. Additionally, some tetramer peaks (esp. those on W2) exhibited significant lineshape broadening, presumably due to the effects of slower motions associated with noncovalent assembly and/or disulfide exchange.

**Table S3:** Chemical shift deviations for oxidized and reduced RWITVTIGGGGCGGGGKKIRVWE (see figure S3 for proposed folding pathways and figure S4 for CD spectra.)

Reduced Form:

| Red/ Mono<br>pH3 | HN 280 | HA 280 | HN 300 | HA 300 | HN 320 | HA 320 |
|------------------|--------|--------|--------|--------|--------|--------|
| R1               |        | -0.47  |        | -0.446 |        | -0.362 |
| W2               | 0.322  | 0.636  | 0.32   | 0.633  | 0.291  | 0.571  |
| I3               | 1.42   | 0.494  | 1.331  | 0.478  | 1.048  | 0.482  |
| T4               | 0.463  | 0.896  | 0.439  | 0.849  | 0.381  | 0.707  |
| V5               | 0.981  | 0.338  | 0.914  | 0.338  | 0.725  | 0.297  |
| T6               | 0.231  | 0.492  | 0.224  | 0.476  | 0.199  | 0.395  |
| I7               | 0.857  | 0.209  | 0.747  | 0.214  | 0.549  | 0.189  |
| C12              | 0.186  | -0.093 | 0.076  | -0.072 | 0.08   | -0.042 |
| K17              | 0.061  | 0.161  | 0.052  | 0.154  | -0.011 | 0.131  |
| K18              | 0.096  | 0.774  | 0.093  | 0.733  | 0.092  | 0.606  |
| I19              | 0.92   | 0.446  | 0.841  | 0.429  | 0.643  | 0.357  |
| R20              | 0.013  | 1.082  | 0.038  | 1.016  | 0.059  | 0.833  |
| V21              | 1.301  | 0.74   | 1.19   | 0.711  | 0.918  | 0.591  |
| W22              | 0.565  | -0.179 | 0.556  | -0.126 | 0.479  | -0.053 |
| E23              | -0.139 | -0.2   | -0.14  | -0.198 | -0.156 | -0.178 |

Oxidized form:

| Ox /di pH3 | HN 280 | HA 280 | HN 300 | HA 300 | HN 320 | HA 320 |
|------------|--------|--------|--------|--------|--------|--------|
| R1         |        | -0.448 |        | -0.431 |        | -0.379 |
| W2         | 0.36   | 0.683  | 0.362  | 0.69   | 0.328  | 0.636  |
| I3         | 1.479  | 0.554  | 1.423  | 0.541  | 1.229  | 0.477  |
| T4         | 0.478  | 0.965  | 0.47   | 0.93   | 0.435  | 0.815  |
| V5         | 0.991  | 0.449  | 0.958  | 0.478  | 0.825  | 0.411  |
| T6         | 0.229  | 0.554  | 0.25   | 0.545  | 0.245  | 0.474  |
| I7         | 0.868  | 0.262  | 0.781  | 0.271  | 0.628  | 0.243  |
| C12        | 0.192  | 0.113  | 0.155  | 0.127  | 0.148  | 0.133  |
| K17        | 0.081  | 0.183  | 0.063  | 0.18   | 0.006  | 0.156  |
| K18        | 0.117  | 0.816  | 0.112  | 0.789  | 0.108  | 0.687  |
| I19        | 0.949  | 0.491  | 0.89   | 0.483  | 0.74   | 0.408  |
| R20        | 0.037  | 1.13   | 0.069  | 1.095  | 0.086  | 0.953  |
| V21        | 1.336  | 0.874  | 1.254  | 0.871  | 1.05   | 0.745  |
| W22        | 0.644  | -0.149 | 0.661  | -0.093 | 0.592  | -0.047 |
| E23        | -0.147 | -0.113 | -0.146 | -0.104 | -0.158 | -0.118 |

Trp 22 diagnostic sidechain CSDs

|         | Ox 280 | Ox 300 | Ox 320 | Red 280 | Red 300 | Red 320 |
|---------|--------|--------|--------|---------|---------|---------|
| W22 Hb3 | -1.253 | -1.161 | -0.986 | -1.223  | -1.109  | -0.89   |
| W22 He3 | -2.433 | -2.249 | -1.896 | -2.445  | -2.202  | -1.716  |
| W22 Hz3 | -0.52  | -0.522 | -0.487 | -0.56   | -0.54   | -0.454  |

**Table S4:** Ratio of the oxidized Cys H<sub>N</sub> chemical shift deviation vs. the average H<sub>N</sub> chemical shift deviation of its two neighbors. Large H<sub>N</sub> CSDs in beta sheets are typically a result of amide protons pointing inward and H-bonding to a cross-strand backbone carbonyl. Since the Cys is at a non-H-bonding site, it is expected to have a lower downfield chemical shift than the H-bonding, inwardly-directed H<sub>N</sub>s of its immediate neighbors, and the ratio is expected to range between 0.4 and 0.7 (a reasonable range for NHB/HB H<sub>N</sub> CSD ratios in most beta sheets). However, deviations (values greater than 1) are observed, especially when beta sheets are long and/or contain more than one cross-strand disulfide. This suggests some atypical twisting or buckling of the beta sheet in these cases. NOEs cannot confirm significant distortion, partly because they are at symmetric positions in most cases (and therefore ambiguous / blended).

Bulky beta branched residues help prevent inward buckling of the beta sheets and maintain lower C/neighbors H<sub>N</sub> CSD ratios, as expected of beta sheets. (This could also be explained by larger CSDs on folding, due to better protection of cross-strand H-bonds.)

When there are multiple disulfides, or a single disulfide corresponding to different positions on heterodimeric strands, the position farthest toward the C-terminus has the lowest, most “sheet-like” value. (This suggests more distortion toward the N-terminus. The trend is also evident in the ratios of i-1 to i+1; the C-term H<sub>N</sub> CSDs are almost always smaller in general.)

|                                      | Cys H <sub>N</sub> / average of i+1, i-1 H <sub>N</sub> |
|--------------------------------------|---------------------------------------------------------|
| KKTCTTT                              | 1.66                                                    |
| KKVCITT                              | 0.93                                                    |
| PWVCKHT                              | 1.17                                                    |
| KWRCIWD <i>conf.1</i>                | 0.74                                                    |
| KWRCIWD <i>conf.2</i>                | 0.38                                                    |
| HWVCIWR <i>conf.1</i>                | 0.70                                                    |
| HWVCIWR <i>conf.2</i>                | 0.26                                                    |
| KWRTVCIRTWE                          | 0.79                                                    |
| RWTTHCHRKWE pH 2                     | 2.97                                                    |
| RWTTHCHRKWE pH 5                     | 2.98                                                    |
| RWTTHCHRKWE pH 8                     | 0.95                                                    |
| KWRTIKVCITKRTWE                      | 0.83                                                    |
| Pr-WVCKWTGPK-NH <sub>2</sub>         | 0.89                                                    |
| WVCKWTGPK-NH <sub>2</sub>            | 13.2                                                    |
| Pr-WTTVCIRTWTGP-NH <sub>2</sub>      | 0.81                                                    |
| WTTVCIRTWTGP-NH <sub>2</sub>         | 0.72                                                    |
| Bz-WHTHCIRKWTGP-NH <sub>2</sub> pH 3 | 1.52                                                    |
| Bz-WITKCIRKWTGKK                     | 1.21                                                    |
| RWITKCISIRKWE <i>homo</i>            | 0.18                                                    |
| RWITKCISIRKWE <i>hetero</i>          | 1.12                                                    |
| RWITKSICIRKWE <i>homo</i>            | -0.03                                                   |
| RWITKSICIRKWE <i>hetero</i>          | 0.71                                                    |
| RWITKCICIRKWE C6                     | 1.27                                                    |
| RWITKCICIRKWE C8                     | 0.96                                                    |
| RWITKTCTIRKWE *                      | 1.68                                                    |
| KWRWRTRCRKIKRWY                      | 1.41                                                    |
| KWRWRTRCICRKIKRWY C8                 | 1.33                                                    |

|                         |      |
|-------------------------|------|
| KWRWRTRCICRRIKRWY C10   | 1.19 |
| KWRWRTRCR               | 1.81 |
| RWKCKCKCKWE C4          | 1.50 |
| RWKCKCKCKWE C6          | 2.37 |
| RWKCKCKCKWE C8          | 1.28 |
| RWITVTIGGGGCGGGGKKIRVWE | 2.78 |

\* Cys in this peptide is at an H-bonding site, so a high ratio is expected.

**Table S5:** Backbone chemical shift deviations for attempted 4-stranded sheet peptides.

**Table S5a:** Backbone CSDs for peptide (KRTTKRDGWVCIWT)<sub>2</sub> (central beta strand with floppy tails extending from N-terminal end of the structured region. Floppy N-terminal region was unassignable due to poor lineshape and overlapped peaks.)

|     | H <sub>N</sub> CSD | H <sub>α</sub> CSD |
|-----|--------------------|--------------------|
| K1  |                    |                    |
| R2  |                    |                    |
| T3  |                    |                    |
| T4  |                    |                    |
| K5  |                    |                    |
| R6  |                    |                    |
| D7  |                    |                    |
| G8  |                    |                    |
| W9  | 1.2                | 0.437              |
| V10 | 1.426              | 0.375              |
| C11 | 0.773              | 1.486              |
| I12 | 1.038              | 0.73               |
| W13 | 0.539              | -0.335             |
| T14 | 0.17               | 0.083              |

**Table S5b:** Backbone CSDs for peptide (KWVCIWDGRKTRT)<sub>2</sub> (central beta strand with floppy tails extending from C-terminal end of the structured region)

|    | H <sub>N</sub> CSD | H <sub>α</sub> CSD |
|----|--------------------|--------------------|
| K1 |                    | -0.421             |
| W2 | 0.504              | 0.388              |
| V3 | 1.264              | 0.284              |
| C4 | 0.871              | 1.481              |
| I5 | 1.012              | 0.729              |
| W6 | 0.843              | -0.399             |
| D7 | -0.243             | -0.036             |
| G8 | 0.041              | -0.051             |

|     |        |        |
|-----|--------|--------|
| R9  | -0.139 | -0.074 |
| K10 | 0.263  | 0.026  |
| T11 | 0.043  | 0.024  |
| T12 | 0.265  |        |
| R13 |        |        |
| T14 |        |        |

**Table S5c:** Backbone CSDs for peptide (RWICRWDEKSGRWITKKID)<sub>2</sub> (complete 4-stranded sheet, with some C-terminal fraying)

|     | H <sub>N</sub> CSD | H <sub>α</sub> CSD |
|-----|--------------------|--------------------|
| R1  |                    | 0.032              |
| W2  | 0.581              | 0.804              |
| I3  | 1.464              | 0.567              |
| C4  | 1.303              | 1.558              |
| R5  | 0.911              | 1.532              |
| W6  | 1.286              | 0.3                |
| W7  | 0.063              | -0.717             |
| D8  | -0.456             | -0.705             |
| E9  | -0.074             | -0.772             |
| K10 | -0.474             | -0.359             |
| S11 | -1.472             | -0.099             |
| G12 | -0.66              | -0.721             |
| R13 | -1.889             | 0.067              |
| W14 | 0.314              | 0.382              |
| I15 | 1.546              | 0.46               |
| T16 | 0.668              | 0.79               |
| K17 | 0.497              | 0.256              |
| K18 | 0.21               | 0.31               |
| I19 | 0.145              | 0.06               |
| D20 | -0.119             | -0.15              |

**Table S6:** Backbone CSDs for peptides of the form (KWTTHCHRKXX)<sub>n</sub>.

**Table S6a:** Backbone CSDs for peptide (KWTTHCHRKWA)<sub>2</sub> (This is the almost-fully-folded oxidized species; compare with fully unfolded reduced species.)

| KWTTHCHRKWA dimer | 280 HN | 280 HA |
|-------------------|--------|--------|
| K1                |        | -0.426 |
| W2                | 0.782  | 0.657  |
| T3                | 1.24   | 0.307  |

|            |       |        |
|------------|-------|--------|
| T4         | 0.711 | 0.621  |
| H5         | 0.63  | 0.228  |
| <b>C6</b>  | 0.68  | 1.17   |
| H7         | 0.583 | 0.404  |
| R8         | 0.5   | 1.123  |
| K9         | 1.014 | 0.77   |
| W10        | 0.859 | -0.126 |
| <b>A11</b> | 0.113 | -0.17  |

**Table S6b:** Backbone CSDs for peptide KWTTHCHRKWA (monomer; reduced. Entirely unstructured.)

| KWTTHCHRKWA mono | 280 HN | 280 HA |
|------------------|--------|--------|
| K1               |        | -0.2   |
| W2               |        | 0.089  |
| T3               | -0.005 | -0.03  |
| T4               | -0.015 | 0.055  |
| H5               | -0.107 | 0.035  |
| C6               | -0.174 | 0.019  |
| H7               | -0.154 | 0.036  |
| R8               | -0.056 | -0.137 |
| K9               | 0.013  | -0.042 |
| W10              | -0.008 | 0.022  |
| <b>A11</b>       | 0.107  | -0.055 |

**Table S6c:** Backbone CSDs for peptide (KWTTHCHRKWT)<sub>2</sub> (This is the fully-folded oxidized species with a properly-aligned beta cap; compare with almost entirely unfolded isomer with the T and W residues swapped, resulting in a misaligned / nonviable beta cap.)

| KWTTHCHRKWT | 280 HN | 280 HA |
|-------------|--------|--------|
| K1          |        | -0.527 |
| W2          | 0.715  | 0.719  |
| T3          | 1.239  | 0.253  |
| T4          | 0.772  | 0.607  |
| H5          | 0.678  | 0.19   |
| C6          | 0.7    | 1.226  |
| H7          | 0.626  | 0.408  |
| R8          | 0.459  | 1.168  |
| K9          | 1.071  | 0.821  |
| W10         | 0.887  | -0.004 |
| <b>T11</b>  | 0.316  | 0.782  |

**Table S6d:** Backbone CSDs for peptide (KWTTHCHRKTW)<sub>2</sub> (This peptide has a misaligned/nonviable beta cap due to the switched positions of the two C-terminal residues. Almost no evidence for folding exists, even as the oxidized dimer.)

| KWTTHCHRKTW | 280 HN | 280 HA |
|-------------|--------|--------|
| K1          |        | -0.141 |
| W2          |        | 0.149  |
| T3          | 0.133  | 0.007  |
| TT4         | 0.032  | 0.002  |
| H5          | -0.108 | 0.07   |
| C6          |        | 0.164  |
| H7          | 0.071  | 0.089  |
| R8          | -0.028 | -0.047 |
| K9          | 0.082  | -0.152 |
| <b>T10</b>  | -0.377 | 0.019  |
| <b>W11</b>  | -0.07  | 0.02   |

**Table S7:** Raw NOEs for beta ribbon peptide (KWRTIKVCITKRTWE)<sub>2</sub>, a simple disulfide-mediated beta strand dimer with exceptional stability and sharp lineshapes. Inter-chain NOEs are highlighted in light blue; ambiguous (inter or intra?) highlighted in gray. (Distance is in residues, not a formal distance calculation.)

| Atoms       | Intensity     | Distance |
|-------------|---------------|----------|
| K1Ha-Hb2    | medium-faint  | 0        |
| K1Ha-W2Hd1  | faint         | 1        |
| K1Ha-W2NH   | very strong   | 1        |
| K1Ha-W14Hh3 | very faint    | 13       |
| K1Ha-W14Hz3 | faint         | 13       |
| K1Hb2-W14NH | medium-faint  | 13       |
| W2Ha-Hb2    | faint         | 0        |
| W2Ha-Hb3    | faint         | 0        |
| W2Ha-Hd1    | faint         | 0        |
| W2Ha-He3    | medium-strong | 0        |
| W2Ha-NH     | medium-faint  | 0        |
| W2Ha-R3NH   | very strong   | 1        |
| W2Ha-T13NH  | very faint    | 11       |
| W2Ha-E15NH  | very faint    | 13       |
| W2Hb2-Hd1   | strong        | 0        |
| W2Hb2-He1   | very faint    | 0        |
| W2Hb2-He3   | faint         | 0        |
| W2Hb2-NH    | medium-strong | 0        |
| W2Hb2-R3NH  | very faint    | 1        |
| W2Hb3-Hb2   | very strong   | 0        |
| W2Hb3-Hd1   | medium-strong | 0        |
| W2Hb3-He3   | medium-faint  | 0        |

|              |               |    |
|--------------|---------------|----|
| W2Hb3-NH     | medium-strong | 0  |
| W2Hb3-R3NH   | faint         | 1  |
| W2Hb3-R12He  | faint         | 10 |
| W2He1-Hd1    | very strong   | 0  |
| W2He1-Hz2    | strong        | 0  |
| W2He1-W14Hz3 | faint         | 12 |
| W2Hz2-He3    | medium-faint  | 0  |
| W2Hz3-Hh3    | very strong   | 0  |
| W2NH-Hd1     | medium-strong | 0  |
| W2NH-He3     | faint         | 0  |
| W2NH-Hz3     | faint         | 0  |
| W2NH-W14Hd1  | faint         | 12 |
| W2NH-E15NH   | very faint    | 13 |
| R3Ha-NH      | medium-faint  | 0  |
| R3Ha-T4NH    | very strong   | 1  |
| R3Ha-T13NH   | very faint    | 10 |
| R3Hb2-NH     | faint         | 0  |
| R3Hb2-T4NH   | faint         | 1  |
| R3Hb3-NH     | faint         | 0  |
| R3Hb3-T4NH   | faint         | 1  |
| R3Hd2-He     | strong        | 0  |
| R3Hg2-T4NH   | very faint    | 1  |
| R3Hg2-T13NH  | faint         | 10 |
| R3Hg3-T4NH   | very faint    | 1  |
| R3Hh21-Hh22  | medium-strong | 0  |
| R3NH-W2He3   | medium-faint  | 1  |
| R3NH-W14NH   | very faint    | 11 |
| T4Ha-Hg2     | strong        | 0  |
| T4Ha-NH      | medium-faint  | 0  |
| T4Ha-I5NH    | very strong   | 1  |
| T4Ha-R12Ha   | very faint    | 8  |
| T4Ha-T13NH   | faint         | 9  |
| T4Hb-Hg2     | very strong   | 0  |
| T4Hb-NH      | medium-strong | 0  |
| T4Hb-V7NH    | faint         | 3  |
| T4Hg2-NH     | faint         | 0  |
| T4Hg2-I5NH   | medium-strong | 1  |
| I5Ha-Hb      | medium-strong | 0  |
| I5Ha-Hg2     | strong        | 0  |
| I5Ha-NH      | medium-strong | 0  |
| I5Ha-K6NH    | very strong   | 1  |
| I5Hb-Hg12    | faint         | 0  |
| I5Hb-Hg13    | medium-faint  | 0  |
| I5Hb-NH      | faint         | 0  |
| I5Hb-T10NH   | medium-strong | 5  |



|             |               |   |
|-------------|---------------|---|
| I5Hg12-Hb   | medium-faint  | 0 |
| I5Hg12-V7NH | medium-faint  | 2 |
| I5Hg13-Hb   | medium-faint  | 0 |
| I5Hg2-K6NH  | medium-faint  | 1 |
| I5NH-K11NH  | medium-strong | 6 |
| K6Ha-Hg3    | faint         | 0 |
| K6Ha-NH     | medium-strong | 0 |
| K6Ha-V7NH   | very strong   | 1 |
| K6Ha-K11NH  | very strong   | 5 |
| K6Hb2-NH    | medium-strong | 0 |
| K6Hb2-V7NH  | faint         | 1 |
| K6Hb3-NH    | medium-strong | 0 |
| K6Hb3-V7NH  | faint         | 1 |
| K6Hg2-NH    | very faint    | 0 |
| K6Hg3-T10NH | faint         | 4 |
| V7Ha-Hb     | faint         | 0 |
| V7Ha-Hg2    | very strong   | 0 |
| V7Ha-NH     | medium-faint  | 0 |
| V7Ha-C8NH   | very strong   | 1 |
| V7Hb-NH     | medium-strong | 0 |
| V7Hb-C8NH   | faint         | 1 |
| V7Hg1-NH    | strong        | 0 |
| C8Ha-V7Hg2  | faint         | 1 |
| C8Ha-Hb2    | very faint    | 0 |
| C8Ha-Hb3    | medium-faint  | 0 |
| C8Ha-NH     | faint         | 0 |
| C8Ha-I9NH   | very strong   | 1 |
| C8Hb2-V7NH  | faint         | 1 |
| C8Hb2-NH    | medium-strong | 0 |
| C8Hb3-K6Hg3 | faint         | 2 |
| C8Hb3-Hb2   | very strong   | 0 |
| C8Hb3-NH    | faint         | 0 |
| C8Hb3-I9NH  | medium-faint  | 1 |
| I9Ha-Hb     | medium-strong | 0 |
| I9Ha-Hd1    | faint         | 0 |
| I9Ha-Hg2    | medium-strong | 0 |
| I9Ha-NH     | medium-strong | 0 |
| I9Ha-T10NH  | very strong   | 1 |
| I9Hb-K6NH   | medium-strong | 3 |
| I9Hb-C8NH   | faint         | 1 |
| I9Hb-Hg13   | faint         | 0 |
| I9Hb-NH     | medium-faint  | 0 |
| I9Hg13-Hb   | medium-faint  | 0 |
| I9Hg13-Hg12 | strong        | 0 |
| I9Hg2-C8NH  | very faint    | 1 |

|              |               |    |
|--------------|---------------|----|
| I9Hg2-NH     | medium-faint  | 0  |
| I9Hg2-T10NH  | medium-faint  | 1  |
| I9NH-T10NH   | medium-faint  | 1  |
| T10Ha-V7Hg2  | faint         | 3  |
| T10Ha-I9Hg2  | faint         | 1  |
| T10Ha-Hg2    | strong        | 0  |
| T10Ha-NH     | medium-strong | 0  |
| T10Ha-K11NH  | very strong   | 1  |
| T10Hb-Hg2    | very strong   | 0  |
| T10Hb-NH     | medium-strong | 0  |
| T10Hb-K11NH  | faint         | 1  |
| T10Hg2-V7NH  | medium-strong | 3  |
| T10Hg2-C8NH  | medium-faint  | 2  |
| T10Hg2-NH    | medium-faint  | 0  |
| K11Ha-Hb2    | medium-faint  | 0  |
| K11Ha-Hg3    | faint         | 0  |
| K11Ha-NH     | medium-faint  | 0  |
| K11Ha-R12NH  | very strong   | 1  |
| K11Hb2-NH    | faint         | 0  |
| K11Hb2-R12NH | faint         | 1  |
| K11Hg3-NH    | faint         | 0  |
| K11Hg3-R12NH | faint         | 1  |
| K11NH-T10NH  | faint         | 1  |
| R12Ha-W2He3  | very faint    | 10 |
| R12Ha-R3NH   | very faint    | 9  |
| R12Ha-T4Hg2  | faint         | 8  |
| R12Ha-I5NH   | faint         | 7  |
| R12Ha-Hb2    | medium-faint  | 0  |
| R12Ha-Hg3    | faint         | 0  |
| R12Ha-NH     | medium-faint  | 0  |
| R12Ha-T13NH  | very strong   | 1  |
| R12Hb-NH     | medium-faint  | 0  |
| R12Hb-T13NH  | faint         | 1  |
| R12Hb2-W2He3 | medium-faint  | 10 |
| R12Hd2-He    | medium-faint  | 0  |
| R12Hd2-Hg3   | faint         | 0  |
| R12Hd3-He    | medium-faint  | 0  |
| R12Hd3-Hg2   | faint         | 0  |
| R12Hg3-W2He3 | medium-faint  | 10 |
| R12Hg3-He    | faint         | 0  |
| R12Hg3-NH    | faint         | 0  |
| R12Hh21-Hh22 | faint         | 0  |
| R12NH-K11NH  | very faint    | 1  |
| T13Ha-Hg2    | medium-strong | 0  |
| T13Ha-NH     | faint         | 0  |

|              |               |    |
|--------------|---------------|----|
| T13Ha-W14NH  | very strong   | 1  |
| T13Hb-I5Hd1  | very faint    | 8  |
| T13Hb-Hg2    | very strong   | 0  |
| T13Hb-NH     | faint         | 0  |
| T13Hb-W14NH  | medium-faint  | 1  |
| T13Hg2-NH    | faint         | 0  |
| T13Hg2-W14NH | faint         | 1  |
| T13NH-W2He3  | faint         | 11 |
| T13NH-R3NH   | medium-faint  | 10 |
| T13NH-R12NH  | very faint    | 1  |
| T13NH-W14NH  | very faint    | 1  |
| W14Ha-W2He3  | faint         | 12 |
| W14Ha-W2Hz3  | very faint    | 12 |
| W14Ha-R3NH   | faint         | 11 |
| W14Ha-Hb2    | faint         | 0  |
| W14Ha-Hb3    | faint         | 0  |
| W14Ha-Hd1    | very faint    | 0  |
| W14Ha-NH     | medium-faint  | 0  |
| W14Ha-E15NH  | very strong   | 1  |
| W14Hb2-W2Hz3 | faint         | 12 |
| W14Hb2-Hd1   | strong        | 0  |
| W14Hb2-He1   | very faint    | 0  |
| W14Hb2-NH    | medium-strong | 0  |
| W14Hb3-W2He3 | faint         | 12 |
| W14Hb3-W2Hz3 | medium-faint  | 12 |
| W14Hb3-Hb2   | very strong   | 0  |
| W14Hb3-Hd1   | medium-strong | 0  |
| W14Hb3-NH    | medium-strong | 0  |
| W14He1-Hd1   | very strong   | 0  |
| W14He1-Hz2   | medium-strong | 0  |
| W14He3-W2He3 | faint         | 12 |
| W14He3-W2Hz3 | very faint    | 12 |
| W14He3-Hh3   | faint         | 0  |
| W14He3-Hz3   | strong        | 0  |
| W14Hz3-W2Hd1 | medium-strong | 12 |
| W14Hz3-W2He1 | medium-faint  | 12 |
| W14Hz3-W2Hz2 | medium-faint  | 12 |
| W14Hz3-Hh3   | very strong   | 0  |
| W14Hz3-NH    | very faint    | 0  |
| W14NH-Hz3    | very faint    | 0  |
| E15Ha-W14Hd1 | faint         | 1  |
| E15Ha-Hb2    | faint         | 0  |
| E15Ha-Hb3    | medium-faint  | 0  |
| E15Ha-Hg2    | faint         | 0  |
| E15Ha-Hg3    | faint         | 0  |

|           |               |   |
|-----------|---------------|---|
| E15Ha-NH  | medium-strong | 0 |
| E15Hb2-NH | very faint    | 0 |
| E15Hg2-NH | faint         | 0 |

**Table S8:** Raw NOEs for beta ribbon peptide (KWRTVCIRTWE)<sub>2</sub>, a simple disulfide-mediated beta strand dimer with exceptional stability and sharp lineshapes. Inter-chain NOEs are highlighted in light blue; ambiguous (inter or intra?) highlighted in gray. (Distance is in residues, not a formal distance calculation.)

| Assignment  | Intensity     | Distance |
|-------------|---------------|----------|
| K1Ha-Hb2    | medium-faint  | 0        |
| K1Ha-Hg3    | very faint    | 0        |
| K1Ha-W2Hd1  | faint         | 1        |
| K1Ha-W2Hz2  | very faint    | 1        |
| K1Ha-W2NH   | very strong   | 1        |
| K1Ha-W10Hh2 | faint         | 9        |
| K1Ha-W10Hz3 | faint         | 9        |
| K1Hb2-W2NH  | medium-strong | 1        |
| K1He3-Hd2   | medium-strong | 0        |
| K1He3-Hg2   | very faint    | 0        |
| K1He3-Hz    | very faint    | 0        |
| K1Hg2-W2NH  | very faint    | 1        |
| W2Ha-K1Ha   | very faint    | 1        |
| W2Ha-Hb2    | faint         | 0        |
| W2Ha-Hb3    | medium-strong | 0        |
| W2Ha-Hd1    | faint         | 0        |
| W2Ha-He3    | medium-strong | 0        |
| W2Ha-Hz3    | very faint    | 0        |
| W2Ha-NH     | medium-faint  | 0        |
| W2Ha-R3NH   | very strong   | 1        |
| W2Ha-T9NH   | faint         | 7        |
| W2Ha-W10Ha  | very faint    | 8        |
| W2Ha-E11NH  | faint         | 9        |
| W2Hb2-Hd1   | strong        | 0        |
| W2Hb2-He1   | very faint    | 0        |
| W2Hb2-He3   | faint         | 0        |
| W2Hb2-NH    | strong        | 0        |
| W2Hb2-R3NH  | very faint    | 1        |
| W2Hb2-R8He  | very faint    | 6        |
| W2Hb3-Hd1   | medium-strong | 0        |
| W2Hb3-He3   | medium-faint  | 0        |
| W2Hb3-NH    | medium-strong | 0        |
| W2Hb3-R3NH  | medium-faint  | 1        |
| W2Hb3-R8Hd2 | very faint    | 6        |
| W2Hb3-R8He  | very faint    | 6        |

|              |               |   |
|--------------|---------------|---|
| W2Hb3-E11Hg3 | very faint    | 9 |
| W2Hb3-E11NH  | very faint    | 9 |
| W2Hd1-NH     | medium-faint  | 0 |
| W2He1-Hd1    | very strong   | 0 |
| W2He1-Hh2    | very faint    | 0 |
| W2He1-Hz2    | medium-strong | 0 |
| W2He1-W10Hd1 | very faint    | 8 |
| W2He1-W10Hh2 | very faint    | 8 |
| W2He1-W10Hz2 | very faint    | 8 |
| W2He1-W10Hz3 | faint         | 8 |
| W2He3-NH     | very faint    | 0 |
| W2He3-R3NH   | medium-faint  | 1 |
| W2He3-T9NH   | faint         | 7 |
| W2He3-W10NH  | very faint    | 8 |
| W2He3-E11NH  | very faint    | 9 |
| W2Hh2-W10NH  | very faint    | 8 |
| W2Hz2-R8He   | very faint    | 6 |
| W2Hz3-W10NH  | medium-faint  | 8 |
| W2NH-R3NH    | very faint    | 1 |
| R3Ha-Hb2     | medium-faint  | 0 |
| R3Ha-Hb3     | medium-faint  | 0 |
| R3Ha-Hd2     | medium-faint  | 0 |
| R3Ha-Hg2     | medium-faint  | 0 |
| R3Ha-Hg3     | faint         | 0 |
| R3Ha-NH      | medium-faint  | 0 |
| R3Ha-T4Hb    | very faint    | 1 |
| R3Ha-T4NH    | very strong   | 1 |
| R3Hb2-He     | very faint    | 0 |
| R3Hb2-NH     | medium-faint  | 0 |
| R3Hb2-T4NH   | faint         | 1 |
| R3Hb3-He     | very faint    | 0 |
| R3Hb3-NH     | medium-faint  | 0 |
| R3Hb3-T4NH   | faint         | 1 |
| R3Hb3-T9NH   | very faint    | 6 |
| R3Hd2-Hb2    | faint         | 0 |
| R3Hd2-Hb3    | faint         | 0 |
| R3Hd2-He     | medium-strong | 0 |
| R3Hd2-Hg3    | faint         | 0 |
| R3Hd2-T4NH   | very faint    | 1 |
| R3Hd2-V5Hg2  | medium-faint  | 2 |
| R3Hg2-He     | faint         | 0 |
| R3Hg2-NH     | faint         | 0 |
| R3Hg2-T4NH   | faint         | 1 |
| R3Hg2-T9NH   | faint         | 6 |
| R3Hg3-He     | faint         | 0 |

|             |               |   |
|-------------|---------------|---|
| R3Hg3-NH    | very faint    | 0 |
| R3Hg3-T4NH  | faint         | 1 |
| R3Hh22-He   | very faint    | 0 |
| R3NH-T9NH   | medium-strong | 6 |
| T4Ha-Hb     | faint         | 0 |
| T4Ha-Hg2    | strong        | 0 |
| T4Ha-NH     | medium-strong | 0 |
| T4Ha-NH     | very strong   | 0 |
| T4Ha-V5Hg2  | faint         | 1 |
| T4Ha-V5NH   | very strong   | 1 |
| T4Ha-T9NH   | faint         | 5 |
| T4Hb-Hg2    | very strong   | 0 |
| T4Hb-NH     | strong        | 0 |
| T4Hb-V5NH   | very faint    | 1 |
| T4Hg2-NH    | medium-faint  | 0 |
| T4Hg2-V5NH  | medium-strong | 1 |
| T4Hg2-C6NH  | very faint    | 2 |
| T4Hg2-I7NH  | medium-faint  | 3 |
| V5Ha-T4Hg2  | very faint    | 1 |
| V5Ha-Hb     | faint         | 0 |
| V5Ha-Hg2    | very strong   | 0 |
| V5Ha-NH     | medium-faint  | 0 |
| V5Ha-C6Hb2  | very faint    | 1 |
| V5Ha-C6NH   | very strong   | 1 |
| V5Ha-I7NH   | medium-faint  | 2 |
| V5Hb-NH     | medium-strong | 0 |
| V5Hb-C6NH   | very faint    | 1 |
| V5Hg2-R3Hd2 | faint         | 2 |
| V5Hg2-R3He  | faint         | 2 |
| V5Hg2-Hb    | very strong   | 0 |
| V5Hg2-NH    | strong        | 0 |
| V5Hg2-C6NH  | medium-strong | 1 |
| V5Hg2-T9Hg2 | strong        | 4 |
| C6Ha-T4Hg2  | faint         | 2 |
| C6Ha-V5NH   | very faint    | 1 |
| C6Ha-Hb2    | faint         | 0 |
| C6Ha-Hb3    | medium-strong | 0 |
| C6Ha-NH     | medium-strong | 0 |
| C6Ha-I7Hb   | very faint    | 1 |
| C6Ha-I7Hg2  | faint         | 1 |
| C6Ha-I7NH   | very strong   | 1 |
| C6Hb2-T4Hg2 | medium-faint  | 2 |
| C6Hb2-NH    | medium-strong | 0 |
| C6Hb2-I7NH  | faint         | 1 |
| C6Hb3-T4Hg2 | strong        | 2 |

|             |               |   |
|-------------|---------------|---|
| C6Hb3-V5NH  | very faint    | 1 |
| C6Hb3-Hb2   | very strong   | 0 |
| C6Hb3-NH    | medium-faint  | 0 |
| C6Hb3-I7NH  | medium-faint  | 1 |
| I7Ha-Hb     | medium-faint  | 0 |
| I7Ha-Hd1    | faint         | 0 |
| I7Ha-Hg12   | very faint    | 0 |
| I7Ha-Hg13   | faint         | 0 |
| I7Ha-Hg2    | strong        | 0 |
| I7Ha-NH     | medium-faint  | 0 |
| I7Ha-R8Hb2  | very faint    | 1 |
| I7Ha-R8Hb3  | very faint    | 1 |
| I7Ha-R8Hg3  | very faint    | 1 |
| I7Ha-R8NH   | very strong   | 1 |
| I7Hb-NH     | medium-faint  | 0 |
| I7Hb-R8NH   | medium-strong | 1 |
| I7Hd1-V5NH  | very faint    | 2 |
| I7Hd1-C6NH  | very faint    | 1 |
| I7Hd1-NH    | very faint    | 0 |
| I7Hd1-T9Hg2 | medium-faint  | 2 |
| I7Hg12-NH   | faint         | 0 |
| I7Hg12-R8NH | faint         | 1 |
| I7Hg13-Hb   | medium-faint  | 0 |
| I7Hg13-NH   | faint         | 0 |
| I7Hg13-R8NH | very faint    | 1 |
| I7Hg2-NH    | medium-strong | 0 |
| I7NH-V5NH   | medium-strong | 2 |
| R8Ha-W2He3  | very faint    | 6 |
| R8Ha-R3NH   | very faint    | 5 |
| R8Ha-T4Hg2  | faint         | 4 |
| R8Ha-T4NH   | very faint    | 4 |
| R8Ha-I7Hg2  | very faint    | 1 |
| R8Ha-Hb2    | faint         | 0 |
| R8Ha-Hb3    | faint         | 0 |
| R8Ha-Hd2    | very faint    | 0 |
| R8Ha-Hg3    | medium-faint  | 0 |
| R8Ha-NH     | medium-strong | 0 |
| R8Ha-T9Hg2  | very faint    | 1 |
| R8Ha-T9NH   | very strong   | 1 |
| R8Hb2-W2He3 | faint         | 6 |
| R8Hb2-W2Hz3 | very faint    | 6 |
| R8Hb2-He    | very faint    | 0 |
| R8Hb2-NH    | medium-strong | 0 |
| R8Hb2-T9NH  | very faint    | 1 |
| R8Hb3-W2He3 | faint         | 6 |

|              |               |   |
|--------------|---------------|---|
| R8Hb3-He     | very faint    | 0 |
| R8Hb3-NH     | medium-faint  | 0 |
| R8Hb3-T9NH   | very faint    | 1 |
| R8Hd2-W2Hb2  | very faint    | 6 |
| R8Hd2-W2He3  | very faint    | 6 |
| R8Hd2-Hb2    | faint         | 0 |
| R8Hd2-He     | medium-strong | 0 |
| R8Hd2-NH     | very faint    | 0 |
| R8Hg2-W2Hz3  | faint         | 6 |
| R8Hg2-W2NH   | very faint    | 6 |
| R8Hg2-NH     | medium-faint  | 0 |
| R8Hg2-T9NH   | faint         | 1 |
| R8Hg3-W2He3  | medium-faint  | 6 |
| R8Hg3-He     | faint         | 0 |
| R8Hh21-Hd2   | very faint    | 0 |
| R8Hh21-He    | very faint    | 0 |
| R8Hh22-Hd2   | very faint    | 0 |
| R8Hh22-He    | very faint    | 0 |
| R8NH-T9NH    | faint         | 1 |
| T9Ha-W2Hz3   | faint         | 7 |
| T9Ha-Hg2     | medium-strong | 0 |
| T9Ha-NH      | medium-faint  | 0 |
| T9Ha-W10Hb2  | very faint    | 1 |
| T9Hb-R3NH    | very faint    | 6 |
| T9Hb-V5Hg2   | medium-faint  | 4 |
| T9Hb-Hg2     | very strong   | 0 |
| T9Hb-NH      | medium-faint  | 0 |
| T9Hb-W10NH   | medium-faint  | 1 |
| T9Hg2-R3He   | very faint    | 6 |
| T9Hg2-R3NH   | very faint    | 6 |
| T9Hg2-R8NH   | very faint    | 1 |
| T9Hg2-NH     | medium-faint  | 0 |
| T9Hg2-W10NH  | medium-faint  | 1 |
| T9Hg2-E11Hg3 | very faint    | 2 |
| W10Ha-W2He3  | medium-faint  | 8 |
| W10Ha-W2Hz3  | very faint    | 8 |
| W10Ha-R3NH   | faint         | 7 |
| W10Ha-Hb2    | faint         | 0 |
| W10Ha-Hb3    | medium-strong | 0 |
| W10Ha-Hd1    | very faint    | 0 |
| W10Ha-NH     | medium-faint  | 0 |
| W10Ha-E11NH  | very strong   | 1 |
| W10Hb2-W2He3 | very faint    | 8 |
| W10Hb2-W2Hh2 | very faint    | 8 |
| W10Hb2-W2Hz3 | very faint    | 8 |



|              |               |   |
|--------------|---------------|---|
| W10Hb2-Hd1   | medium-strong | 0 |
| W10Hb2-He1   | very faint    | 0 |
| W10Hb2-NH    | strong        | 0 |
| W10Hb2-E11NH | very faint    | 1 |
| W10Hb3-W2He3 | very faint    | 8 |
| W10Hb3-W2Hh2 | faint         | 8 |
| W10Hb3-W2Hz3 | medium-faint  | 8 |
| W10Hb3-Hd1   | medium-faint  | 0 |
| W10Hb3-He1   | very faint    | 0 |
| W10Hb3-NH    | medium-strong | 0 |
| W10Hb3-E11NH | very faint    | 1 |
| W10Hd1-NH    | very faint    | 0 |
| W10Hd1-E11NH | very faint    | 1 |
| W10He1-Hd1   | very strong   | 0 |
| W10He1-Hh2   | very faint    | 0 |
| W10He1-Hz2   | medium-strong | 0 |
| W10He3-K1Ha  | very faint    | 9 |
| W10He3-W2Hd1 | faint         | 8 |
| W10He3-W2He1 | faint         | 8 |
| W10He3-W2He3 | faint         | 8 |
| W10He3-W2Hh2 | very faint    | 8 |
| W10He3-W2Hz2 | medium-faint  | 8 |
| W10He3-W2Hz3 | very faint    | 8 |
| W10He3-W2NH  | very faint    | 8 |
| W10He3-R3NH  | very faint    | 7 |
| W10He3-Ha    | very faint    | 0 |
| W10He3-Hb2   | very faint    | 0 |
| W10He3-Hb3   | medium-faint  | 0 |
| W10He3-Hh2   | faint         | 0 |
| W10He3-Hz3   | very strong   | 0 |
| W10He3-NH    | very faint    | 0 |
| W10He3-E11NH | faint         | 1 |
| W10Hh2-W2NH  | very faint    | 8 |
| W10Hz2-Hh2   | very faint    | 0 |
| W10Hz3-W2Hd1 | medium-strong | 8 |
| W10Hz3-W2NH  | faint         | 8 |
| W10Hz3-Hh2   | very strong   | 0 |
| W10NH-R3NH   | very faint    | 7 |
| W10NH-T9NH   | very faint    | 1 |
| E11Ha-W10Hd1 | very faint    | 1 |
| E11Ha-Hb2    | very faint    | 0 |
| E11Ha-Hb3    | medium-faint  | 0 |
| E11Ha-Hg3    | faint         | 0 |
| E11Ha-NH     | medium-strong | 0 |
| E11Hb2-T9NH  | very faint    | 2 |

|              |            |   |
|--------------|------------|---|
| E11Hb2-NH    | faint      | 0 |
| E11Hb3-T9NH  | faint      | 2 |
| E11Hb3-NH    | faint      | 0 |
| E11Hg2-R3NH  | very faint | 8 |
| E11Hg2-NH    | faint      | 0 |
| E11NH-R3NH   | very faint | 8 |
| E11NH-W10He1 | very faint | 1 |
| E11NH-W10NH  | very faint | 1 |

**Table S9:** Raw NOEs for beta ribbon peptide (KWRCIWD)<sub>2</sub>, a disulfide-mediated beta strand dimer which can also exist (in this case, in the same sample) as a higher-order oligomer. (Likely a tetramer.) Data for the two separate conformers are highlighted in orange and purple; orange represents the presumed tetramer, and purple represents the presumed dimer. Inter-chain NOEs are highlighted in light blue, “impossible” intra-indole NOEs that can only be explained by higher-order assembly (e.g., as the proposed tetramer) are in orange, and ambiguous NOEs appear in gray. Sample concentration was 3.5 mM (per chain; 1.75 mM of dimer). (Distance is in residues, not a formal distance calculation.)

| Atoms        | Intensity     | Distance |
|--------------|---------------|----------|
| K1Ha-Hb2     | medium-strong | 0        |
| K1Ha-Hg2     | faint         | 0        |
| K1Ha-W2Hd1   | very faint    | 1        |
| K1Ha-W2NH    | very strong   | 1        |
| K1Ha-W6Hh2   | faint         | 5        |
| K1Ha-W6Hz3   | medium-faint  | 5        |
| K1Hb2-W2NH   | medium-strong | 1        |
| K1Hb2-W6Hz3  | very faint    | 5        |
| K1Hb2-D7NH   | very faint    | 6        |
| K1He2-Hd2    | strong        | 0        |
| K1He2-Hg2    | faint         | 0        |
| K1Hg2-W2NH   | faint         | 1        |
| K1'Ha-Hb2    | medium-faint  | 0        |
| K1'Ha-W2'Hd1 | very faint    | 1        |
| K1'Ha-W2'NH  | strong        | 1        |
| K1'Ha-W6Hh2  | very faint    | 5        |
| K1'Ha-W6'Hz3 | faint         | 5        |
| K1'Ha-D7'NH  | very faint    | 6        |
| K1'Hb2-W2'NH | medium-faint  | 1        |
| K1'Hg2-W2'NH | very faint    | 1        |
| K1'Hg2-D7'NH | very faint    | 6        |
| W2Ha-Hb2     | faint         | 0        |
| W2Ha-He3     | medium-faint  | 0        |
| W2Ha-NH      | faint         | 0        |
| W2Ha-R3Hb2   | very faint    | 1        |
| W2Ha-R3NH    | very strong   | 1        |

|               |               |   |
|---------------|---------------|---|
| W2Ha-W6Ha     | very faint    | 4 |
| W2Ha-D7NH     | faint         | 5 |
| W2Hb2-Hd1     | very faint    | 0 |
| W2Hb2-He3     | faint         | 0 |
| W2Hb2-NH      | faint         | 0 |
| W2Hb2-R3NH    | faint         | 1 |
| W2Hb3-Hd1     | faint         | 0 |
| W2Hb3-He3     | faint         | 0 |
| W2Hb3-NH      | medium-strong | 0 |
| W2Hb3-R3NH    | very faint    | 1 |
| W2He1-Hd1     | medium-faint  | 0 |
| W2He1-He3     | faint         | 0 |
| W2He1-Hh2     | very faint    | 0 |
| W2He1-Hz2     | medium-strong | 0 |
| W2He1-W6Hd1   | very faint    | 4 |
| W2He1-W6Hz3   | faint         | 4 |
| W2He3-Hd1     | very faint    | 0 |
| W2He3-D7NH    | very faint    | 5 |
| W2Hh2-Hd1     | very faint    | 0 |
| W2Hz2-Hd1     | very faint    | 0 |
| W2NH-Hd1      | faint         | 0 |
| W2NH-He3      | very faint    | 0 |
| W2NH-R3NH     | very faint    | 1 |
| W2NH-W6Hz3    | faint         | 4 |
| W2'Ha-K1'Ha   | very faint    | 1 |
| W2'Ha-Hb2     | medium-strong | 0 |
| W2'Ha-Hd1     | very faint    | 0 |
| W2'Ha-He3     | medium-strong | 0 |
| W2'Ha-NH      | faint         | 0 |
| W2'Ha-R3'NH   | very strong   | 1 |
| W2'Ha-I5'NH   | very faint    | 3 |
| W2'Ha-D7'NH   | faint         | 5 |
| W2'Hb2-Hd1    | strong        | 0 |
| W2'Hb2-He1    | very faint    | 0 |
| W2'Hb2-He3    | medium-strong | 0 |
| W2'Hb2-NH     | strong        | 0 |
| W2'Hb2-R3'NH  | faint         | 1 |
| W2'Hb2-W6'Hz3 | very faint    | 4 |
| W2'Hd1-NH     | faint         | 0 |
| W2'Hd1-W6'Hh2 | faint         | 4 |
| W2'He1-Hd1    | very strong   | 0 |
| W2'He1-Hh2    | very faint    | 0 |
| W2'He1-Hz2    | medium-faint  | 0 |
| W2'He1-W6'Hz3 | very faint    | 4 |
| W2'He3-NH     | very faint    | 0 |

|              |               |   |
|--------------|---------------|---|
| W2'He3-R3'NH | faint         | 1 |
| W2'He3-I5'NH | very faint    | 3 |
| W2'He3-W6'NH | very faint    | 4 |
| W2'He3-D7'NH | very faint    | 5 |
| W2'Hh2-Hz2   | very strong   | 0 |
| W2'Hh2-W6'NH | very faint    | 4 |
| W2'Hz3-He3   | very strong   | 0 |
| W2'Hz3-Hh2   | very strong   | 0 |
| W2'Hz3-I5'NH | very faint    | 3 |
| W2'Hz3-W6'NH | faint         | 4 |
| R3Ha-W2NH    | very faint    | 1 |
| R3Ha-Hb2     | medium-strong | 0 |
| R3Ha-Hg2     | medium-faint  | 0 |
| R3Ha-NH      | medium-faint  | 0 |
| R3Ha-C4NH    | very strong   | 1 |
| R3Ha-I5Hg2   | medium-faint  | 2 |
| R3Hb2-He     | faint         | 0 |
| R3Hb2-NH     | medium-faint  | 0 |
| R3Hb2-C4NH   | medium-faint  | 1 |
| R3Hb2-I5Hd1  | faint         | 2 |
| R3Hb2-I5Hg2  | faint         | 2 |
| R3Hb2-D7NH   | very faint    | 4 |
| R3Hd2-He     | medium-strong | 0 |
| R3Hd2-NH     | very faint    | 0 |
| R3Hd2-I5Hd1  | very faint    | 2 |
| R3Hd2-I5Hg2  | faint         | 2 |
| R3Hg2-He     | medium-faint  | 0 |
| R3Hg2-NH     | medium-faint  | 0 |
| R3Hg2-C4NH   | very faint    | 1 |
| R3NH-W2He3   | medium-faint  | 1 |
| R3NH-W2Hz3   | very faint    | 1 |
| R3'Ha-NH     | medium-faint  | 0 |
| R3'Ha-C4'NH  | very strong   | 1 |
| R3'Hb2-NH    | faint         | 0 |
| R3'Hb2-C4'NH | very faint    | 1 |
| R3'Hb3-NH    | faint         | 0 |
| R3'Hb3-C4'NH | very faint    | 1 |
| R3'Hg2-He    | very faint    | 0 |
| R3'Hg2-NH    | very faint    | 0 |
| R3'Hg2-C4'NH | very faint    | 1 |
| R3'Hg3-NH    | very faint    | 0 |
| R3'Hg3-C4'NH | very faint    | 1 |
| R3'NH-W2'He3 | faint         | 1 |
| R3'NH-W2'NH  | very faint    | 1 |
| R3'NH-I5'NH  | faint         | 2 |

|               |               |   |
|---------------|---------------|---|
| C4Ha-Hb2      | faint         | 0 |
| C4Ha-Hb3      | medium-faint  | 0 |
| C4Ha-NH       | faint         | 0 |
| C4Ha-I5Hb     | very faint    | 1 |
| C4Ha-I5Hg2    | very faint    | 1 |
| C4Ha-I5NH     | very strong   | 1 |
| C4Hb2-W2He3   | faint         | 2 |
| C4Hb2-W2Hz3   | very faint    | 2 |
| C4Hb2-NH      | medium-strong | 0 |
| C4Hb2-I5NH    | faint         | 1 |
| C4Hb3-W2He3   | medium-faint  | 2 |
| C4Hb3-W2Hz3   | very faint    | 2 |
| C4Hb3-NH      | medium-faint  | 0 |
| C4Hb3-I5NH    | faint         | 1 |
| C4NH-R3NH     | very faint    | 1 |
| C4NH-I5NH     | very faint    | 1 |
| C4'Ha-W2'Hb2  | very faint    | 2 |
| C4'Ha-W2'He3  | very faint    | 2 |
| C4'Ha-R3'NH   | very faint    | 1 |
| C4'Ha-Hb2     | faint         | 0 |
| C4'Ha-Hb3     | medium-faint  | 0 |
| C4'Ha-NH      | medium-faint  | 0 |
| C4'Ha-I5'Hg13 | very faint    | 1 |
| C4'Ha-I5'Hg2  | very faint    | 1 |
| C4'Ha-I5'NH   | very strong   | 1 |
| C4'Hb2-W2'He3 | faint         | 2 |
| C4'Hb2-W2'Hz3 | very faint    | 2 |
| C4'Hb2-NH     | medium-faint  | 0 |
| C4'Hb2-I5'NH  | very faint    | 1 |
| C4'Hb2-W6'He1 | very faint    | 2 |
| C4'Hb3-W2'He3 | medium-strong | 2 |
| C4'Hb3-W2'Hz3 | very faint    | 2 |
| C4'Hb3-R3'NH  | very faint    | 1 |
| C4'Hb3-NH     | very faint    | 0 |
| C4'Hb3-I5'NH  | faint         | 1 |
| I5Ha-W2He3    | medium-faint  | 3 |
| I5Ha-W2Hz2    | faint         | 3 |
| I5Ha-W2Hz3    | medium-strong | 3 |
| I5Ha-Hb       | medium-strong | 0 |
| I5Ha-Hd1      | medium-faint  | 0 |
| I5Ha-Hg12     | faint         | 0 |
| I5Ha-Hg13     | very faint    | 0 |
| I5Ha-Hg2      | strong        | 0 |
| I5Ha-NH       | medium-faint  | 0 |
| I5Ha-W6NH     | very strong   | 1 |

|               |               |   |
|---------------|---------------|---|
| I5Hb-W2Hz3    | very faint    | 3 |
| I5Hb-R3He     | very faint    | 2 |
| I5Hb-Hd1      | medium-strong | 0 |
| I5Hb-Hg12     | medium-strong | 0 |
| I5Hb-Hg13     | medium-faint  | 0 |
| I5Hb-Hg2      | very strong   | 0 |
| I5Hb-NH       | faint         | 0 |
| I5Hb-W6NH     | medium-strong | 1 |
| I5Hd1-R3He    | very faint    | 2 |
| I5Hd1-NH      | faint         | 0 |
| I5Hd1-W6NH    | very faint    | 1 |
| I5Hd1-D7NH    | very faint    | 2 |
| I5Hg12-NH     | medium-faint  | 0 |
| I5Hg12-W6NH   | faint         | 1 |
| I5Hg12-D7NH   | very faint    | 2 |
| I5Hg13-NH     | medium-faint  | 0 |
| I5Hg13-W6NH   | very faint    | 1 |
| I5Hg2-W2Hz3   | very faint    | 3 |
| I5Hg2-R3He    | very faint    | 2 |
| I5Hg2-C4NH    | very faint    | 1 |
| I5Hg2-NH      | medium-strong | 0 |
| I5Hg2-W6NH    | medium-faint  | 1 |
| I5Hg2-D7NH    | very faint    | 2 |
| I5'Ha-W2'He3  | faint         | 3 |
| I5'Ha-W2'Hz3  | faint         | 3 |
| I5'Ha-NH      | medium-faint  | 0 |
| I5'Ha-W6'Hb3  | very faint    | 1 |
| I5'Ha-W6'NH   | very strong   | 1 |
| I5'Hb-NH      | faint         | 0 |
| I5'Hb-W6'NH   | medium-faint  | 1 |
| I5'Hd1-NH     | very faint    | 0 |
| I5'Hd1-W6'NH  | very faint    | 1 |
| I5'Hg12-NH    | very faint    | 0 |
| I5'Hg12-W6'NH | very faint    | 1 |
| I5'Hg13-NH    | very faint    | 0 |
| I5'Hg13-W6'NH | very faint    | 1 |
| I5'Hg2-R3'NH  | very faint    | 2 |
| I5'Hg2-NH     | very faint    | 0 |
| I5'Hg2-W6'NH  | faint         | 1 |
| I5'Hg2-D7'NH  | very faint    | 2 |
| W6Ha-W2He3    | very faint    | 4 |
| W6Ha-W2Hz3    | very faint    | 4 |
| W6Ha-R3NH     | faint         | 3 |
| W6Ha-I5Hb     | very faint    | 1 |
| W6Ha-Hb2      | faint         | 0 |

|               |               |   |
|---------------|---------------|---|
| W6Ha-Hb3      | faint         | 0 |
| W6Ha-Hd1      | very faint    | 0 |
| W6Ha-Hz3      | very faint    | 0 |
| W6Ha-NH       | faint         | 0 |
| W6Ha-D7Hb3    | very faint    | 1 |
| W6Ha-D7NH     | very strong   | 1 |
| W6Hb2-W2Hh2   | very faint    | 4 |
| W6Hb2-W2Hz2   | very faint    | 4 |
| W6Hb2-Hd1     | strong        | 0 |
| W6Hb2-He1     | very faint    | 0 |
| W6Hb2-NH      | medium-strong | 0 |
| W6Hb3-W2Hz2   | faint         | 4 |
| W6Hb3-W2Hz3   | very faint    | 4 |
| W6Hb3-Hd1     | medium-faint  | 0 |
| W6Hb3-NH      | medium-faint  | 0 |
| W6Hb3-D7NH    | very faint    | 1 |
| W6Hd1-D7NH    | very faint    | 1 |
| W6He1-Hd1     | very strong   | 0 |
| W6He1-Hh2     | very faint    | 0 |
| W6He1-Hz2     | medium-strong | 0 |
| W6He3-W2Hd1   | very faint    | 4 |
| W6He3-Hb2     | very faint    | 0 |
| W6He3-Hb3     | faint         | 0 |
| W6He3-Hz3     | strong        | 0 |
| W6Hh2-Hz2     | medium-strong | 0 |
| W6Hz3-W2Hd1   | faint         | 4 |
| W6Hz3-Hh2     | strong        | 0 |
| W6Hz3-Hz2     | medium-faint  | 0 |
| W6NH-W2He3    | very faint    | 4 |
| W6NH-W2Hz3    | faint         | 4 |
| W6NH-I5NH     | very faint    | 1 |
| W6NH-Hd1      | faint         | 0 |
| W6'Ha-W2'He3  | faint         | 4 |
| W6'Ha-W2'Hz3  | very faint    | 4 |
| W6'Ha-R3'NH   | very faint    | 3 |
| W6'Ha-Hb2     | faint         | 0 |
| W6'Ha-Hb3     | medium-faint  | 0 |
| W6'Ha-Hd1     | very faint    | 0 |
| W6'Ha-NH      | faint         | 0 |
| W6'Ha-D7'NH   | very strong   | 1 |
| W6'Hb2-Hd1    | strong        | 0 |
| W6'Hb2-NH     | medium-strong | 0 |
| W6'Hb2-D7'NH  | very faint    | 1 |
| W6'Hb3-W2'He3 | very faint    | 4 |
| W6'Hb3-W2'Hh2 | very faint    | 4 |

|                           |               |   |
|---------------------------|---------------|---|
| W6'Hb3-W2'H <sub>2</sub>  | very faint    | 4 |
| W6'Hb3-W2'H <sub>3</sub>  | faint         | 4 |
| W6'Hb3-Hd1                | medium-faint  | 0 |
| W6'Hb3-NH                 | medium-faint  | 0 |
| W6'Hb3-D7'NH              | very faint    | 1 |
| W6'Hd1-NH                 | very faint    | 0 |
| W6'He1-Hd1                | very strong   | 0 |
| W6'He1-Hh2                | very faint    | 0 |
| W6'He1-Hz2                | medium-strong | 0 |
| W6'He3-K1'Ha              | very faint    | 5 |
| W6'He3-W2'Hb2             | very faint    | 4 |
| W6'He3-W2'Hd1             | very faint    | 4 |
| W6'He3-W2'He1             | very faint    | 4 |
| W6'He3-W2'He3             | very faint    | 4 |
| W6'He3-W2'H <sub>2</sub>  | very faint    | 4 |
| W6'He3-W2'NH              | very faint    | 4 |
| W6'He3-Hb2                | very faint    | 0 |
| W6'He3-Hb3                | faint         | 0 |
| W6'He3-Hz3                | medium-strong | 0 |
| W6'He3-D7'NH              | very faint    | 1 |
| W6'H <sub>3</sub> -W2'Hd1 | medium-faint  | 4 |
| W6'H <sub>3</sub> -W2'NH  | very faint    | 4 |
| W6'H <sub>3</sub> -Hh2    | very strong   | 0 |
| W6'H <sub>3</sub> -Hz2    | faint         | 0 |
| D7Ha-I5Hd1                | very faint    | 2 |
| D7Ha-W6Hd1                | medium-faint  | 1 |
| D7Ha-W6He1                | very faint    | 1 |
| D7Ha-Hb2                  | faint         | 0 |
| D7Ha-Hb3                  | medium-faint  | 0 |
| D7Ha-NH                   | medium-strong | 0 |
| D7Hb2-I5Hd1               | very faint    | 2 |
| D7Hb2-NH                  | faint         | 0 |
| D7Hb3-I5Hd1               | faint         | 2 |
| D7Hb3-W6Hd1               | very faint    | 1 |
| D7Hb3-NH                  | faint         | 0 |
| D7NH-W2NH                 | very faint    | 5 |
| D7NH-R3NH                 | very faint    | 4 |
| D7NH-W6NH                 | very faint    | 1 |
| D7'Ha-Hb2                 | faint         | 0 |
| D7'Ha-Hb3                 | medium-faint  | 0 |
| D7'Ha-NH                  | medium-strong | 0 |
| D7'Hb2-NH                 | very faint    | 0 |
| D7'Hb3-NH                 | very faint    | 0 |
| D7'NH-R3'NH               | very faint    | 4 |
| D7'NH-W6'NH               | very faint    | 1 |



**Table S10:** Raw NOEs for “disulfide zipper” peptide (RWKCKCKCKWE)<sub>2</sub>, an amphiphilic beta-strand dimer with superfluous disulfide crosslinks. The oligomerization state (e.g., simple dimer, dimer of dimers, or mix of higher-order assemblies) cannot be determined. Lineshapes in the middle of the chain are poor (presumably due to medium-slow exchange between oligomeric states) which makes precise structure determination impossible. (For example, the sheet is likely to be highly buckled and/or twisted in this region, due to the three consecutive tight disulfide constraints, but confirmation of the precise nature of this distortion is impossible with the current data.)

Distances (in residues) are highlighted in blue if the corresponding NOEs are inter-chain (e.g., consistent with confirmed interchain NOEs seen in related structures, and only explainable by contacts at a dimer interface), and in gray if they are ambiguous.

| Atoms       | Intensity     | Distance |
|-------------|---------------|----------|
| R1Ha-Hb2    | medium-strong | 0        |
| R1Ha-Hb3    | medium-strong | 0        |
| R1Ha-Hg2    | very faint    | 0        |
| R1Ha-Hg3    | very faint    | 0        |
| R1Ha-W2NH   | faint         | 1        |
| R1Ha-W10Hh2 | very faint    | 9        |
| R1Ha-W10Hz3 | very faint    | 9        |
| R1Hd2-Hb2   | medium-strong | 0        |
| R1Hd2-Hg2   | strong        | 0        |
| R1Hd3-Hg3   | medium-strong | 0        |
| W2Ha-Hd1    | very faint    | 0        |
| W2Ha-NH     | very faint    | 0        |
| W2Ha-K3NH   | faint         | 1        |
| W2Ha-W10Ha  | very faint    | 8        |
| W2Hb2-NH    | faint         | 0        |
| W2Hb3-Hd1   | medium-faint  | 0        |
| W2NH-Hd1    | very faint    | 0        |
| K3Ha-W2Hd1  | very faint    | 1        |
| K3Ha-Hb3    | strong        | 0        |
| K3Ha-Hg2    | medium-strong | 0        |
| K3Ha-Hg3    | medium-faint  | 0        |
| K3Ha-NH     | very strong   | 0        |
| K3Ha-C4NH   | very strong   | 1        |
| K3Hb2-C4NH  | medium-faint  | 1        |
| K3Hb3-NH    | medium-faint  | 0        |
| K3Hb3-C4NH  | medium-faint  | 1        |
| K3He2-Hg2   | medium-faint  | 0        |
| K3He3-Hd3   | strong        | 0        |
| K3He3-Hg3   | medium-faint  | 0        |

|            |               |   |
|------------|---------------|---|
| K3NH-W2Hz3 | faint         | 1 |
| K3NH-K9NH  | faint         | 6 |
| K3NH-E11NH | very faint    | 8 |
| C4Ha-NH    | faint         | 0 |
| C4Ha-K5NH  | very strong   | 1 |
| C4Hb2-NH   | medium-faint  | 0 |
| C4Hb2-K5NH | medium-faint  | 1 |
| C4Hb3-NH   | faint         | 0 |
| C4Hb3-K5NH | medium-strong | 1 |
| K5Ha-C4Ha  | medium-strong | 1 |
| K5Ha-NH    | strong        | 0 |
| K5Ha-C6NH  | very strong   | 1 |
| K5Ha-K9NH  | very faint    | 4 |
| K5Hb2-NH   | medium-strong | 0 |
| K5Hb2-C6NH | faint         | 1 |
| K5Hb3-NH   | strong        | 0 |
| K5Hg2-NH   | faint         | 0 |
| K5Hg3-NH   | faint         | 0 |
| C6Ha-K5Hb2 | medium-faint  | 1 |
| C6Ha-K5Hb3 | medium-faint  | 1 |
| C6Ha-NH    | medium-faint  | 0 |
| C6Ha-K7NH  | very strong   | 1 |
| C6Hb2-NH   | medium-strong | 0 |
| C6Hb2-K7NH | medium-strong | 1 |
| C6Hb3-NH   | medium-faint  | 0 |
| C6Hb3-K7NH | strong        | 1 |
| C6NH-K5NH  | faint         | 1 |
| C6NH-K7NH  | faint         | 1 |
| K7Ha-C6Ha  | medium-strong | 1 |
| K7Ha-NH    | strong        | 0 |
| K7Ha-C8NH  | medium-faint  | 1 |
| K7Hb2-NH   | strong        | 0 |
| K7Hb3-NH   | strong        | 0 |
| K7Hg2-NH   | medium-faint  | 0 |
| K7Hg3-NH   | faint         | 0 |
| C8Ha-W2Hz3 | very faint    | 6 |
| C8Ha-K7Hb2 | medium-faint  | 1 |
| C8Ha-K7Hb3 | medium-faint  | 1 |
| C8Ha-K7Hg3 | very faint    | 1 |
| C8Ha-NH    | very faint    | 0 |
| C8Ha-K9NH  | strong        | 1 |
| K9Ha-W2Hz3 | faint         | 7 |
| K9Ha-K3NH  | very faint    | 6 |
| K9Ha-Hb2   | medium-strong | 0 |
| K9Ha-Hb3   | medium-strong | 0 |

|              |               |   |
|--------------|---------------|---|
| K9Ha-Hd3     | faint         | 0 |
| K9Ha-Hg2     | faint         | 0 |
| K9Ha-Hg3     | faint         | 0 |
| K9Ha-NH      | faint         | 0 |
| K9Ha-W10NH   | faint         | 1 |
| K9Hb2-NH     | faint         | 0 |
| K9Hb3-NH     | faint         | 0 |
| K9Hg2-NH     | faint         | 0 |
| K9Hg3-NH     | very faint    | 0 |
| K9NH-W2Hz3   | faint         | 7 |
| W10Ha-W2Hz3  | faint         | 8 |
| W10Ha-K3NH   | very faint    | 7 |
| W10Ha-Hb2    | faint         | 0 |
| W10Ha-Hd1    | faint         | 0 |
| W10Ha-E11NH  | very strong   | 1 |
| W10Hb2-Hd1   | strong        | 0 |
| W10Hb2-E11NH | very faint    | 1 |
| W10Hb3-Hb2   | medium-strong | 0 |
| W10Hb3-Hd1   | medium-faint  | 0 |
| W10He1-Hd1   | very strong   | 0 |
| W10He3-Hh2   | very faint    | 0 |
| W10He3-Hz3   | very faint    | 0 |
| W10Hz3-Hh2   | medium-strong | 0 |
| W10NH-Hd1    | faint         | 0 |
| E11Ha-W10Hd1 | medium-faint  | 1 |
| E11Ha-NH     | medium-strong | 0 |
| E11Hb2-NH    | faint         | 0 |
| E11Hb3-NH    | medium-faint  | 0 |
| E11Hg2-NH    | faint         | 0 |
| E11Hg3-NH    | faint         | 0 |

**Table S11:** Raw NOEs for peptide (RWICRWDEKSGRWITKKID)<sub>2</sub>, a hairpin that dimerizes (via a disulfide-centered sheet) to a four-stranded sheet. (The outer strands appear frayed at the ends, and lineshape broadening in the inner strands has hampered the calculation of consistency-calibrated distance constraints.)

Distances (in residues) are highlighted in blue if the corresponding NOEs are inter-chain (e.g., consistent with confirmed interchain NOEs seen in related structures, and only explainable by contacts at a dimer interface), and in gray if they are ambiguous.

| Atoms      | intensity    | distance |
|------------|--------------|----------|
| R1Ha-Hb2   | medium-faint | 0        |
| R1Ha-Hb3   | faint        | 0        |
| R1Ha-Hg3   | faint        | 0        |
| R1Ha-W2NH  | strong       | 1        |
| R1Ha-W6Hz3 | faint        | 5        |

|              |             |    |
|--------------|-------------|----|
| R1Hd2-Hg2    | strong      | 0  |
| W2Ha-Hb2     | faint       | 0  |
| W2Ha-Hd1     | faint       | 0  |
| W2Ha-NH      | very faint  | 0  |
| W2Ha-I3NH    | medium      | 1  |
| W2Ha-W14Hh2  | faint       | 12 |
| W2Hb2-Hd1    | strong      | 0  |
| W2Hb3-NH     | medium      | 0  |
| W2He1-Hd1    | strong      | 0  |
| W2He1-Hz2    | medium      | 0  |
| W2Hh2-Hz2    | strong      | 0  |
| W2Hz3-He3    | very strong | 0  |
| W2Hz3-Hz2    | very strong | 0  |
| I3Ha-NH      | medium      | 0  |
| I3Ha-C4NH    | medium      | 1  |
| I3Hb-Hd1     | medium      | 0  |
| I3Hb-Hg2     | very strong | 0  |
| I3Hb-NH      | faint       | 0  |
| I3Hb-C4NH    | very faint  | 1  |
| I3Hb-W6NH    | faint       | 3  |
| I3Hd1-W14Hh2 | faint       | 11 |
| I3Hd1-W14Hz2 | very faint  | 11 |
| I3Hd1-W14Hz3 | faint       | 11 |
| I3Hg12-Hd1   | strong      | 0  |
| I3Hg13-Hd1   | strong      | 0  |
| I3Hg2-NH     | very faint  | 0  |
| I3Hg2-C4NH   | very faint  | 1  |
| I3Hg2-W14Hh2 | faint       | 11 |
| I3Hg2-W14Hz3 | faint       | 11 |
| C4Ha-NH      | very faint  | 0  |
| C4Ha-R5NH    | medium      | 1  |
| C4Hb2-W2Hd1  | medium      | 2  |
| C4Hb2-NH     | very faint  | 0  |
| C4Hb2-R5NH   | very faint  | 1  |
| C4Hb3-W2He3  | strong      | 2  |
| C4Hb3-NH     | very faint  | 0  |
| C4Hb3-R5NH   | very faint  | 1  |
| R5Ha-W2Hh2   | faint       | 3  |
| R5Ha-Hb2     | faint       | 0  |
| R5Ha-NH      | very faint  | 0  |
| R5Ha-W6NH    | medium      | 1  |
| R5Ha-K17NH   | very faint  | 12 |
| R5Hb2-W6NH   | faint       | 1  |
| R5Hb3-W6NH   | very faint  | 1  |
| R5Hg3-NH     | very faint  | 0  |

|              |             |   |
|--------------|-------------|---|
| W6Ha-W2Ha    | faint       | 4 |
| W6Ha-Hb2     | very faint  | 0 |
| W6Ha-Hb3     | very faint  | 0 |
| W6Ha-Hd1     | very faint  | 0 |
| W6Ha-NH      | faint       | 0 |
| W6Ha-W7NH    | faint       | 1 |
| W6Ha-W14Hh2  | faint       | 8 |
| W6Hb2-Hb3    | faint       | 0 |
| W6Hb2-Hd1    | very faint  | 0 |
| W6Hb2-NH     | faint       | 0 |
| W6He1-Hd1    | medium      | 0 |
| W6He1-Hz2    | strong      | 0 |
| W6He3-Hz3    | strong      | 0 |
| W6Hz3-Hh2    | very strong | 0 |
| W6Hz3-Hz2    | medium      | 0 |
| W6NH-W2Hh2   | faint       | 4 |
| W6NH-W2Hz3   | very faint  | 4 |
| W7Ha-NH      | very faint  | 0 |
| W7Ha-D8NH    | medium      | 1 |
| W7Ha-W14He3  | faint       | 7 |
| W7Hb2-Hd1    | medium      | 0 |
| W7Hb2-NH     | very faint  | 0 |
| W7Hb3-Hb2    | medium      | 0 |
| W7Hb3-Hd1    | faint       | 0 |
| W7Hb3-NH     | very faint  | 0 |
| W7Hd1-E9NH   | very faint  | 2 |
| W7He1-Hd1    | very strong | 0 |
| W7He1-Hz2    | strong      | 0 |
| W7Hh2-Hz2    | very strong | 0 |
| W7Hz3-Hh2    | very strong | 0 |
| W7Hz3-W14Hd1 | medium      | 7 |
| W7Hz3-W14NH  | very faint  | 7 |
| W7NH-W14Hh2  | faint       | 7 |
| D8Ha-W6He1   | very faint  | 2 |
| D8Ha-NH      | faint       | 0 |
| D8Ha-E9NH    | very strong | 1 |
| D8Hb2-NH     | medium      | 0 |
| D8Hb2-G12NH  | faint       | 4 |
| D8Hb3-NH     | faint       | 0 |
| E9Ha-W7Hd1   | faint       | 2 |
| E9Ha-W7He1   | strong      | 2 |
| E9Ha-W7Hz2   | faint       | 2 |
| E9Ha-NH      | medium      | 0 |
| E9Ha-K10NH   | very faint  | 1 |
| E9Ha-G12NH   | faint       | 3 |

|              |             |   |
|--------------|-------------|---|
| E9Hb2-W7Hd1  | faint       | 2 |
| E9Hb2-NH     | strong      | 0 |
| E9Hb3-W7Hd1  | faint       | 2 |
| E9Hb3-NH     | strong      | 0 |
| E9Hb3-K10NH  | faint       | 1 |
| E9Hg2-NH     | very faint  | 0 |
| E9Hg3-NH     | faint       | 0 |
| E9NH-W7Hd1   | very faint  | 2 |
| K10Ha-W6Hz3  | very faint  | 4 |
| K10Ha-E9NH   | strong      | 1 |
| K10Ha-Hb2    | very strong | 0 |
| K10Ha-Hd2    | faint       | 0 |
| K10Ha-Hg2    | faint       | 0 |
| K10Ha-Hg3    | faint       | 0 |
| K10Ha-NH     | strong      | 0 |
| K10Hb2-NH    | very strong | 0 |
| K10Hg2-NH    | very faint  | 0 |
| K10NH-E9NH   | medium      | 1 |
| S11Ha-W7Hh2  | very faint  | 4 |
| S11Ha-NH     | faint       | 0 |
| S11Ha-G12NH  | faint       | 1 |
| S11Hb2-G12NH | faint       | 1 |
| S11Hb3-G12NH | faint       | 1 |
| S11NH-G12NH  | medium      | 1 |
| G12Ha2-W7Hh2 | faint       | 5 |
| G12Ha2-W7Hz2 | medium      | 5 |
| G12Ha2-NH    | medium      | 0 |
| G12Ha3-W7Hh2 | faint       | 5 |
| G12Ha3-W7Hz2 | medium      | 5 |
| G12Ha3-NH    | strong      | 0 |
| G12NH-R13NH  | very faint  | 1 |
| R13Ha-W7Hz3  | faint       | 6 |
| R13Ha-W14Hd1 | faint       | 1 |
| R13Ha-W14NH  | very strong | 1 |
| R13Hb3-W14NH | medium      | 1 |
| R13Hg2-W14NH | faint       | 1 |
| W14Ha-NH     | very faint  | 0 |
| W14Hb2-Hd1   | strong      | 0 |
| W14Hb2-He3   | faint       | 0 |
| W14Hb2-NH    | medium      | 0 |
| W14Hb2-I15NH | very faint  | 1 |
| W14Hb3-Hd1   | medium      | 0 |
| W14Hb3-He3   | medium      | 0 |
| W14Hb3-NH    | faint       | 0 |
| W14Hb3-I15NH | very faint  | 1 |

|               |             |    |
|---------------|-------------|----|
| W14He1-W7Hz3  | faint       | 7  |
| W14He1-Hd1    | very strong | 0  |
| W14He1-Hz2    | strong      | 0  |
| W14Hh2-Hz2    | very strong | 0  |
| W14Hz3-He3    | faint       | 0  |
| W14Hz3-Hz2    | very strong | 0  |
| W14NH-W7Hz3   | very faint  | 7  |
| W14NH-Hd1     | medium      | 0  |
| I15Ha-Hd1     | medium      | 0  |
| I15Ha-Hg2     | strong      | 0  |
| I15Ha-NH      | very faint  | 0  |
| I15Ha-T16NH   | strong      | 1  |
| I15Hb-Hd1     | medium      | 0  |
| I15Hb-Hg2     | strong      | 0  |
| I15Hb-NH      | very faint  | 0  |
| I15Hb-T16NH   | very faint  | 1  |
| I15Hd1-W6Hd1  | very faint  | 9  |
| I15Hd1-W6Hz3  | very faint  | 9  |
| I15Hd1-T16NH  | very faint  | 1  |
| I15Hg12-NH    | very faint  | 0  |
| I15Hg13-W6Hz3 | very faint  | 9  |
| I15Hg13-NH    | very faint  | 0  |
| I15Hg2-NH     | very faint  | 0  |
| I15Hg2-T16NH  | faint       | 1  |
| T16Ha-Hg2     | faint       | 0  |
| T16Ha-NH      | medium      | 0  |
| T16Ha-K17NH   | faint       | 1  |
| T16Hb-Hg2     | very strong | 0  |
| T16Hb-NH      | medium      | 0  |
| T16Hg2-NH     | medium      | 0  |
| K17Ha-NH      | faint       | 0  |
| K17Ha-K18NH   | very strong | 1  |
| K17Hb2-NH     | very faint  | 0  |
| K17Hb2-K18NH  | medium      | 1  |
| K17Hb3-NH     | very faint  | 0  |
| K17Hb3-K18NH  | faint       | 1  |
| K17He2-Hg3    | medium      | 0  |
| K17He3-Hg3    | faint       | 0  |
| K17Hg3-NH     | faint       | 0  |
| K18Ha-NH      | medium      | 0  |
| K18Ha-I19NH   | very strong | 1  |
| K18Hb2-NH     | medium      | 0  |
| K18Hb3-NH     | strong      | 0  |
| K18Hg3-W2Hz3  | medium      | 16 |
| K18Hg3-NH     | faint       | 0  |

|              |             |    |
|--------------|-------------|----|
| I19Ha-NH     | medium      | 0  |
| I19Ha-D20NH  | very strong | 1  |
| I19Hb-Hd1    | medium      | 0  |
| I19Hb-NH     | strong      | 0  |
| I19Hb-D20NH  | medium      | 1  |
| I19Hg12-NH   | faint       | 0  |
| I19Hg13-NH   | faint       | 0  |
| I19Hg2-W6Hz2 | faint       | 13 |
| I19Hg2-NH    | faint       | 0  |
| I19Hg2-D20NH | medium      | 1  |
| D20Ha-NH     | strong      | 0  |
| D20Hb2-NH    | faint       | 0  |
| D20Hb3-NH    | medium      | 0  |
